# Supplementary material for: Mental health burden following extreme weather events in South-east Asia: A systematic review and meta-analysis
Source: PubMed Central journal article supplement — Indian J Psychiatry. 2024 Aug 19;66(8):683–94. doi: 10.4103/indianjpsychiatry.indianjpsychiatry_348_24 (PMC11469557; doi:10.4103/indianjpsychiatry.indianjpsychiatry_348_24), 2024-08-19
Supplement: IJPsy-66-683_Suppl1.pdf [file IJPsy-66-683_Suppl1.pdf]

**Supplementary Table 4: Characteristics of the selected studies including instruments used and mode of administration (n=155)**

| First author                                                   | Event period            | Study country | Study period        | Age of participants (years) | Sample size | Study setting | Study participants | Instruments used <sup>1</sup>                   | Mode of administration | Witnessed death of kin (%) |
|----------------------------------------------------------------|-------------------------|---------------|---------------------|-----------------------------|-------------|---------------|--------------------|-------------------------------------------------|------------------------|----------------------------|
| Studies on Cyclone<br>Kar <i>et al.</i> , 2004 <sup>[58]</sup> | 29 Oct 1999             | India         | Mar - Dec 2000      | 16-60+                      | 540         | Community     | Residents          | SRQ; IES; PTSS; HS; SS; HADS; PSLES; CSI; SSMCS | Offline                | 30.6                       |
| Kar <i>et al.</i> , 2006 <sup>[70]</sup>                       | 29 Oct 1999             | India         | Dec 2000            | 15-17                       | 108         | School        | Residents          | MINI-KID; DSM-IV                                | Offline                | ...                        |
| Kar <i>et al.</i> , 2007 <sup>[71]</sup>                       | 29 Oct 1999             | India         | Nov - Dec 2000      | 7-17                        | 447         | Community     | Residents          | ICD-10-DCR                                      | Offline                | 3.8                        |
| Suar <i>et al.</i> , 2002 <sup>[23]</sup>                      | 29 Oct 1999             | India         | Jan 2000            | 18+                         | 65          | Community     | Residents          | MPI; IELCSeale; TAI; BDI; DSM-IV                | Offline                | 32                         |
| Kim <i>et al.</i> , 2010 <sup>[75]</sup>                       | 02 May 2008             | Myanmar       | Jun 2008            | 0-65+                       | 2641        | Hospital      | Residents          | DSM-IV                                          | ...                    | ...                        |
| Hanč <i>et al.</i> , 2022 <sup>[47]</sup>                      | 23-26 May 2009          | India         | Jun 2009 - Feb 2010 | 8-11                        | 552         | School        | Residents          | CTRS-R; S; HRSS                                 | Offline                | ...                        |
| Mamun <i>et al.</i> , 2019 <sup>[85]</sup>                     | 30 May 2017             | Bangladesh    | Sep - Oct 2017      | 18-40+                      | 111         | Community     | Residents          | PHQ-9                                           | Offline                | 17.1                       |
| Kar <i>et al.</i> , 2021 <sup>[72]</sup>                       | 03 May 2019             | India         | Jun 2019            | ...                         | 80          | Community     | Residents          | PC-PTSD-5; GAD-7; PHQ-9                         | Offline                | 0                          |
| Hossain <i>et al.</i> , 2021 <sup>[6]</sup>                    | 01 May 2020             | Bangladesh    | Aug-20              | ≥18                         | 478         | Community     | Residents          | BSRS-5                                          | Offline                | ...                        |
| Studies on Flood<br>Kaiser, 2023 <sup>[69]</sup>               | ...                     | Bangladesh    | Jun -Dec 2021       | 21-60                       | 80          | Community     | Residents          | Structured questionnaire                        | Offline                | ...                        |
| Mathew, 2021 <sup>[93]</sup>                                   | ...                     | India         | 2019                | ...                         | 32          | Community     | Residents          | VAS                                             | Offline                | ...                        |
| Wahid <i>et al.</i> , 2023 <sup>[5]</sup>                      | ...                     | Bangladesh    | Aug 2019 - Feb 2020 | 15-66+                      | 7086        | Community     | Residents          | PHQ-9, GAD-7                                    | Offline                | ...                        |
| Joy <i>et al.</i> , 2021 <sup>[68]</sup>                       | 01 Aug 2019             | India         | Dec 2019            | 25-45                       | 374         | Community     | Residents          | LHS; PWS; EBS                                   | Offline                | ...                        |
| Amarnath <i>et al.</i> , 2016 <sup>[77]</sup>                  | 02 Dec 2015             | India         | Dec 2005            | 0-61+                       | 130         | Community     | Residents          | MEDIPRESENCE software                           | Online (Telemedicine)  | ...                        |
| Ishikawa <i>et al.</i> , 2013 <sup>[62]</sup>                  | 05 Aug 2010             | India         | Sep 2010            | ...                         | 318         | Community     | Residents          | PHQ-2, DSM-IV                                   | Offline                | ...                        |
| Asim <i>et al.</i> , 2022 <sup>[22]</sup>                      | 15 Aug 2018             | India         | Nov 2019 - Jan 2020 | 18-60+                      | 276         | Community     | Residents          | PCL-5; DSM-V; PHQ-9; GAD-7                      | Offline                | 0.7                        |
| Haris <i>et al.</i> , 2020 <sup>[48]</sup>                     | 15 Aug 2018             | India         | Aug-Sep 2018        | ...                         | 36826       | Hospital      | Residents          | Medical examination                             | Offline                | ...                        |
| Chamaveerachari <i>et al.</i> , 2015 <sup>[32]</sup>           | 16-17 June 2013         | India         | Jul 2013            | 0.5-85                      | 825         | Community     | Residents          | ICD-10                                          | Offline                | ...                        |
| Telles <i>et al.</i> , 2009 <sup>[27]</sup>                    | 18 Aug 2008             | India         | Sep 2008            | 15-85                       | 1289        | Community     | Residents          | SQD                                             | Offline                | ...                        |
| Mahmud <i>et al.</i> , 2021 <sup>[87]</sup>                    | 20 Aug 2017             | Bangladesh    | ...                 | ...                         | 106         | Community     | Residents          | PCL-5; GAD-7; PHQ-9                             | Offline                | ...                        |
| Oba <i>et al.</i> , 2011 <sup>[102]</sup>                      | 22 May 2007             | Thailand      | Jan 2008            | 20-60+                      | 354         | Community     | Residents          | PWQ                                             | Offline                | ...                        |
| Yoda <i>et al.</i> , 2017 <sup>[45]</sup>                      | 25 Jul 2011-16 Jan 2012 | Thailand      | May - Jun 2012      | ...                         | 212         | Community     | Residents          | K10-SMI                                         | Offline                | ...                        |
| Hassan <i>et al.</i> , 2018 <sup>[49]</sup>                    | 9-10 Sep 2014           | India         | Sep 2014            | 13-18                       | 64          | Community     | Residents          | CRIES-8                                         | Offline                | 0                          |
| Mathew <i>et al.</i> , 2021 <sup>[92]</sup>                    | Aug - Oct 2018          | India         | Jun - Aug 2019      | 16-18                       | 670         | School        | Residents          | TSQ; DSM-IV                                     | Offline                | 0.9                        |
| Telles <i>et al.</i> , 2010 <sup>[28]</sup>                    | Aug 2008                | India         | Sep 2008            | ...                         | 22          | Community     | Residents          | SQD; VAS                                        | Offline (Face-to-face) | 100                        |
| Thomas <i>et al.</i> , 2021 <sup>[30]</sup>                    | Aug 2018                | India         | Dec 2018 - Feb 2019 | 18-65                       | 171         | Community     | Residents          | DSM-5-TR Level 1 CCSM                           | Offline                | ...                        |
| Ma <i>et al.</i> , 2019 <sup>[86]</sup>                        | Dec 2014                | Malaysia      | Sep - Dec 2015      | ...                         | 53          | Community     | Residents          | SF-36; HADS                                     | Offline                | ...                        |
| Bandla <i>et al.</i> , 2019 <sup>[26]</sup>                    | Dec 2015                | India         | Feb 2016            | 18-60+                      | 223         | Community     | Residents          | PCL-C; BAI; BDI; WHO-5                          | Offline                | 9.4                        |
| Wind <i>et al.</i> , 2013 <sup>[9]</sup>                       | Jul - Aug 2008          | India         | Oct 2008            | ...                         | 318         | Community     | Residents          | HSCL-25                                         | Offline                | ...                        |
| Wind <i>et al.</i> , 2014 <sup>[44]</sup>                      | Jul - Aug 2008          | India         | Oct 2008            | ...                         | 318         | Community     | Residents          | HSCL-25                                         | Offline                | ...                        |

Contd...

**Supplementary Table 4: Contd...**

| First author                                          | Event period        | Study country   | Study period   | Age of participants (years) | Sample size | Study setting | Study participants | Instruments used <sup>1</sup>                           | Mode of administration | Witnessed death of kin (%) |
|-------------------------------------------------------|---------------------|-----------------|----------------|-----------------------------|-------------|---------------|--------------------|---------------------------------------------------------|------------------------|----------------------------|
| Sanguanklin <i>et al.</i> , 2014 <sup>[16]</sup>      | Jul 2011 - Jan 2012 | Thailand        | Feb - Apr 2012 | 19-43                       | 175         | Hospital      | Residents          | CES-D                                                   | Offline                | ...                        |
| Mamun <i>et al.</i> , 2021 <sup>[89]</sup>            | Jun - July 2019     | Bangladesh      | Nov - Dec 2019 | ...                         | 348         | Community     | Residents          | PHQ-9; GAD-7; TSQ-10                                    | Offline (Face-to-face) | 8.05                       |
| Assanangkornchai <i>et al.</i> , 2004 <sup>[23]</sup> | Nov 2000            | Thailand        | ...            | 14-85                       | 590         | Community     | Residents          | IES; GHQ-12                                             | Offline                | 6.3                        |
| Assanangkornchai <i>et al.</i> , 2007 <sup>[24]</sup> | Nov 2000            | Thailand        | Feb 2001       | <30-45+                     | 590         | Community     | Residents          | IES-R; GHQ-12                                           | Offline (Face-to-face) | ...                        |
| Dar <i>et al.</i> , 2018 <sup>[3]</sup>               | Sep 2014            | India           | Feb 2015       | 30-40                       | 87          | Community     | Residents          | PCL-S; BDI; PSSS                                        | Offline (By Post)      | ...                        |
| Singh & Verma, 2023 <sup>[118]</sup>                  | Sep 2014            | India           | Sep 2014       | 18-60+                      | 185         | Community     | Residents          | IES-R; DSM-IV                                           | Offline                | ...                        |
| Studies on Tsunami                                    |                     |                 |                |                             |             |               |                    |                                                         |                        |                            |
| Adebäck <i>et al.</i> , 2021 <sup>[13]</sup>          | 26 Dec 2004         | Indonesia       | 2014-2015      | 19-25                       | 210         | Community     | Tourists           | GHQ 12; IES-R                                           | Offline (By Post)      | 16.2                       |
| Adebäck <i>et al.</i> , 2018 <sup>[14]</sup>          | 26 Dec 2004         | South-east Asia | Aug 2013       | 10-15                       | 210         | Community     | Tourists           | GHQ-12; IES-R; SRH                                      | Online (Web Service)   | 13.8                       |
| Agampodi <i>et al.</i> , 2011 <sup>[15]</sup>         | 26 Dec 2004         | Sri Lanka       | Sep 2005       | 14-16                       | 593         | School        | Residents          | SDQ; PTSD-RI                                            | Offline                | 27.3                       |
| Agustini <i>et al.</i> , 2011 <sup>[16]</sup>         | 26 Dec 2004         | Indonesia       | Jun 2009       | 11-19                       | 482         | School        | Residents          | CPTSD-RI; TESS, TESS-OS; TESS-DS                        | Offline                | 24.2                       |
| Arnberg <i>et al.</i> , 2012 <sup>[20]</sup>          | 26 Dec 2004         | South-east Asia | Feb 2006       | ...                         | 460         | Community     | Tourists           | GHQ-12; IES-R, CSS                                      | Offline (By Post)      | 10.2                       |
| Arnberg <i>et al.</i> , 2013 <sup>[54]</sup>          | 26 Dec 2004         | South-east Asia | Dec 2010       | ...                         | 142         | Community     | Tourists           | DSM-IV; BFI; IES-R; SARS-R                              | Offline (By Post)      | 13.4                       |
| Arnberg <i>et al.</i> , 2014 <sup>[21]</sup>          | 26 Dec 2004         | South-east Asia | Dec 2005       | ...                         | 140         | Community     | Tourists           | IES-R; IES-6; PCL; GHQ-12; SCID-1                       | ...                    | ...                        |
| Arnberg <i>et al.</i> , 2015 <sup>[19]</sup>          | 26 Dec 2004         | South-east Asia | Jul 2005       | 16-49+                      | 12504       | Community     | Tourists           | The Swedish Patient Register                            | Offline (By Post)      | 2.7                        |
| Baddam John <i>et al.</i> , 2007 <sup>[25]</sup>      | 26 Dec 2004         | India           | Feb 2005       | 5-18                        | 502         | Community     | Residents          | IES-8; CBCL-PTSD-TR                                     | Offline                | 8.76                       |
| Banford <i>et al.</i> , 2016 <sup>[27]</sup>          | 26 Dec 2004         | Sri Lanka       | Apr 2005       | ...                         | 163         | Community     | Residents          | CES-D                                                   | Offline                | ...                        |
| Becker, 2009 <sup>[28]</sup>                          | 26 Dec 2004         | India           | Apr - Jun 2006 | 18-56+                      | 100         | Community     | Residents          | IES; DSM-IV TR                                          | Offline                | 70                         |
| Berger & Gelkopf, 2009 <sup>[29]</sup>                | 26 Dec 2004         | Sri Lanka       | Feb - May 2006 | 9-14                        | 166         | School        | Residents          | DSM-IV (Child Version); UCLA PTSD Index; CDIS; DPS; BDI | Offline                | 60.2                       |
| Bondjers <i>et al.</i> , 2018 <sup>[30]</sup>         | 26 Dec 2004         | South-east Asia | Feb 2006       | 17-90                       | 1638        | Community     | Tourists           | IES-R                                                   | Offline (By Post)      | ...                        |
| Chaiphibalsarisai, 2008 <sup>[31]</sup>               | 26 Dec 2004         | Thailand        | Jun - Nov 2005 | 29+                         | 1392        | Community     | Residents          | WHOQOL-100; WHOQOL-BREF-26                              | ...                    | ...                        |
| Dawson & Bryant, 2016 <sup>[34]</sup>                 | 26 Dec 2004         | Indonesia       | Dec 2009       | 7-13                        | 110         | Community     | Residents          | CRIES-13;                                               | Offline                | 57.3                       |
| Descilo <i>et al.</i> , 2009 <sup>[7]</sup>           | 26 Dec 2004         | India           | Aug 2005       | 18-65                       | 183         | Community     | Residents          | PCL-17; BDI-21; GHQ-12                                  | Offline                | 64.4                       |
| Du <i>et al.</i> , 2012 <sup>[35]</sup>               | 26 Dec 2004         | Indonesia       | Jun - Aug 2007 | 5-14                        | 155         | Community     | Residents          | FSSC-R                                                  | Offline                | ...                        |
| Dyb <i>et al.</i> , 2011 <sup>[36]</sup>              | 26 Dec 2004         | South-east Asia | Jun - Aug 2005 | 6-18                        | 319         | Community     | Tourists           | DSM-IV; CSDC; IES-R                                     | Offline (By Post)      | 3.8                        |
| Dyster-Aas <i>et al.</i> , 2012 <sup>[37]</sup>       | 26 Dec 2004         | South-east Asia | Feb 2006       | ...                         | 1497        | Community     | Tourists           | IES-R; GHQ-12                                           | Offline (By Post)      | ...                        |
| Exenberger <i>et al.</i> , 2016 <sup>[38]</sup>       | 26 Dec 2004         | India           | Feb - Apr 2009 | 8-17                        | 177         | Community     | Residents          | PTGI-C-R; CRIES-8                                       | Offline                | ...                        |

Contd...

**Supplementary Table 4: Contd...**

| First author                                        | Event period | Study country   | Study period        | Age of participants (years) | Sample size | Study setting | Study participants | Instruments used <sup>1</sup>                             | Mode of administration | Witnessed death of kin (%) |
|-----------------------------------------------------|--------------|-----------------|---------------------|-----------------------------|-------------|---------------|--------------------|-----------------------------------------------------------|------------------------|----------------------------|
| Exenberger <i>et al.</i> , 2019 <sup>[39]</sup>     | 26 Dec 2004  | India           | Feb - Oct 2009      | 8-17                        | 164         | Community     | Residents          | DSM-IV; CRIES-13; PRCRS; IES-R                            | Offline                | ...                        |
| Faisal & Zulfa, 2004 <sup>[40]</sup>                | 26 Dec 2004  | Indonesia       | Aug - Sep 2009      | 7-13                        | 262         | Community     | Residents          | PsySTART; TSCC; CPSS; DSM-IV                              | Offline                | 46.2                       |
| Frankenberg <i>et al.</i> , 2012 <sup>[42]</sup>    | 26 Dec 2004  | South-east Asia | May 2005 - Jul 2006 | ...                         | 17609       | Community     | Residents          | 17-item PCL-C                                             | ...                    | ...                        |
| Frankenberg <i>et al.</i> , 2008 <sup>[41]</sup>    | 26 Dec 2004  | Indonesia       | May 2005 - Jul 2006 | 15+                         | 20539       | Community     | Residents          | 7-item PCL-C                                              | Offline                | 29.8                       |
| George <i>et al.</i> , 2012 <sup>[43]</sup>         | 26 Dec 2004  | India           | Sep - Nov 2005      | 18-85                       | 532         | Community     | Residents          | GHQ-12                                                    | Offline                | 8.1                        |
| Gudmundsdottir <i>et al.</i> , 2018 <sup>[44]</sup> | 26 Dec 2004  | South-east Asia | Feb 2006            | 16-60+                      | 4446        | Community     | Tourists (Sweden)  | IES-R; GHQ-12                                             | Offline (By Post)      | 9.8                        |
| Gunaratne <i>et al.</i> , 2014 <sup>[45]</sup>      | 26 Dec 2004  | Sri Lanka       | Jan 2005            | 18-46                       | 305         | Community     | Residents          | DSM-IV                                                    | Offline                | 8.9                        |
| Hagen <i>et al.</i> , 2016 <sup>[46]</sup>          | 26 Dec 2004  | Thailand        | Dec 2006            | ...                         | 25          | Community     | Tourists (Norway)  | FFMQ; IES-R; WASI                                         | Offline (By Post)      | ...                        |
| Heir & Weisaeth, 2008 <sup>[45]</sup>               | 26 Dec 2004  | South-east Asia | Jun 2005            | 18-82                       | 637         | Community     | Tourists (Norway)  | GHQ-28                                                    | Offline (By Post)      | 8.2                        |
| Heir <i>et al.</i> , 2009a <sup>[41]</sup>          | 26 Dec 2004  | Thailand        | Jun 2005            | 18-82                       | 416         | Community     | Tourists (Norway)  | DSM-IV; IES-R; GHQ-28; 4-item BFI; GSES; CSS; 12-item LEI | Offline (By Post)      | ...                        |
| Heir <i>et al.</i> , 2009b <sup>[42]</sup>          | 26 Dec 2004  | South-east Asia | Jun 2005            | ...                         | 720         | Community     | Tourists (Norway)  | GHQ-28; IES-R; PTSS-10                                    | Offline (By Post)      | ...                        |
| Heir <i>et al.</i> , 2010 <sup>[50]</sup>           | 26 Dec 2004  | South-east Asia | Jun 2005            | 18+                         | 844         | Community     | Tourists (Norway)  | IES-R; CLLS                                               | Offline                | ...                        |
| Heir <i>et al.</i> , 2011 <sup>[53]</sup>           | 26 Dec 2004  | South-east Asia | Jun 2005            | 18+                         | 720         | Community     | Tourists (Norway)  | IES-R                                                     | Offline (By Post)      | ...                        |
|                                                     | 26 Dec 2004  | South-east Asia | Oct 2005            | 18+                         | 731         | Community     | Tourists (Norway)  | PCL                                                       | Offline (By Post)      | ...                        |
|                                                     | 26 Dec 2004  | South-east Asia | Feb 2006            | 18+                         | 3447        | Community     | Tourists (Norway)  | IES-R                                                     | Offline (By Post)      | ...                        |
| Heir <i>et al.</i> , 2021 <sup>[54]</sup>           | 26 Dec 2004  | Thailand        | Jun 2005            | 18-                         | 525         | Community     | Tourists (Norway)  | 4-item BFI; GSES; IES-R; 12-item LEI                      | Offline (By Post)      | 7.4                        |
| Hollfield <i>et al.</i> , 2008 <sup>[56]</sup>      | 26 Dec 2004  | Sri Lanka       | Aug - Sep 2005      | 18-80                       | 89          | Community     | Residents          | HSCCL-25; PSS-SR; NMRSCCL-121                             | Offline                | 51                         |
| Hussain <i>et al.</i> , 2011 <sup>[58]</sup>        | 26 Dec 2004  | South-east Asia | Dec 2006            | 18+                         | 1162        | Community     | Tourists (Norway)  | (LTE-Q; IES-R; GHQ-28; LOL                                | Offline (By Post)      | 7.5                        |
| Hussain <i>et al.</i> , 2013 <sup>[57]</sup>        | 26 Dec 2004  | South-east Asia | Jun 2005            | 18-81                       | 674         | Community     | Tourists (Norway)  | The 44-item BFI; CSS; DSM-IV; IES-R                       | Offline (By Post)      | 7.3                        |
| Irmansyah <i>et al.</i> , 2010 <sup>[59]</sup>      | 26 Dec 2004  | Indonesia       | Feb - Mar 2005      |                             | 783         | Community     | Residents          | SRQ-20; CDR Scale-2                                       | ...                    | 65.5                       |
| Isaranuwatthai <i>et al.</i> , 2013 <sup>[61]</sup> | 26 Dec 2004  | Thailand        | Oct 2005            | 14+                         | 1889        | Community     | Residents          | SF-36                                                     | Offline                | ...                        |
| Isaranuwatthai <i>et al.</i> , 2017 <sup>[60]</sup> | 26 Dec 2004  | Thailand        | Oct 2005 - Mar 2006 | 14+                         | 1931        | Community     | Residents          | SF-36                                                     | Offline (Face-to-face) | 5.6                        |

Contd...

**Supplementary Table 4: Contd...**

| First author                                      | Event period | Study country   | Study period        | Age of participants (years) | Sample size | Study setting     | Study participants     | Instruments used <sup>1</sup>                       | Mode of administration | Witnessed death of kin (%) |
|---------------------------------------------------|--------------|-----------------|---------------------|-----------------------------|-------------|-------------------|------------------------|-----------------------------------------------------|------------------------|----------------------------|
| Isuru <i>et al.</i> , 2018 <sup>[63]</sup>        | 26 Dec 2004  | Sri Lanka       | 2016                | ...                         | 143         | Community         | Residents              | GHQ-30; BDI-II; PSS-SR; DSM-5                       | Offline                | ...                        |
| Jensen <i>et al.</i> , 2009 <sup>[64]</sup>       | 26 Dec 2004  | South-east Asia | Oct 2005            | 6-17                        | 133         | Community         | Tourists (Norway)      | IES-R; PTSD-RI                                      | Offline (Face-to-face) | ...                        |
| Johannesson <i>et al.</i> , 2009a <sup>[60]</sup> | 26 Dec 2004  | South-east Asia | Feb 2006            | 16-71+                      | 4822        | Community         | Tourists (Sweden)      | GHQ-12; IES-R                                       | Offline (By Post)      | 9.95                       |
| Johannesson <i>et al.</i> , 2009b <sup>[65]</sup> | 26 Dec 2004  | South-east Asia | Feb 2006            | 16-51+                      | 3519        | Community         | Tourists (Sweden)      | IES-R; GHQ-12; ICG                                  | Offline (By Post)      | 14.1                       |
| Johannesson <i>et al.</i> , 2011a <sup>[66]</sup> | 26 Dec 2004  | South-east Asia | Apr 2006            | 141                         | Community   | Tourists (Sweden) | IES-R; GHQ-12, ICG     | IES-R; GHQ-12, ICG                                  | Offline (By Post)      | 100                        |
| Johannesson <i>et al.</i> , 2011b <sup>[61]</sup> | 26 Dec 2004  | South-east Asia | Feb 2006            | 16-61+                      | 3456        | Community         | Tourists (Sweden)      | IES-R; GHQ-12                                       | Offline (By Post)      | 3.8                        |
| Johannesson <i>et al.</i> , 2015 <sup>[67]</sup>  | 26 Dec 2004  | South-east Asia | Feb 2006            | 16+                         | 4932        | Community         | Tourists (Sweden)      | IES-R; GHQ-12                                       | Offline (By Post)      | 4.7                        |
| Kar <i>et al.</i> , 2014 <sup>[59]</sup>          | 26 Dec 2004  | India           | Jul 2009            | 18-97                       | 666         | Community         | Residents              | SRQ; ZSDS; ZSAS; SRS-PTSD; SS                       | Offline                | 9.8                        |
| Keraite <i>et al.</i> , 2016 <sup>[73]</sup>      | 26 Dec 2004  | Sri Lanka       | 2007                | 18-75                       | 1054        | Community         | Residents              | PSQ                                                 | Offline                | ...                        |
| Ketunam <i>et al.</i> , 2009 <sup>[74]</sup>      | 26 Dec 2004  | Thailand        | Nov 2006            | ...                         | 436         | Community         | Residents              | IES-R; DSM-IV                                       | Offline                | ...                        |
| Kongsakon <i>et al.</i> , 2012 <sup>[76]</sup>    | 26 Dec 2004  | Thailand        | Jul - Aug 2005      | 24-45+                      | 434         | Community         | Residents              | SF-36                                               | Offline                | 7.8                        |
| Kraemer <i>et al.</i> , 2009a <sup>[77]</sup>     | 26 Dec 2004  | South-east Asia | Mar - Sep 2007      | ...                         | 342         | Community         | Tourists (Switzerland) | PDS; HADS; PTGI                                     | Offline (By Post)      | ...                        |
| Kraemer <i>et al.</i> , 2009b <sup>[78]</sup>     | 26 Dec 2004  | South-east Asia | Sep 2007            | 20-83                       | 340         | Community         | Tourists (Switzerland) | PDS; DSM-IV                                         | Offline (By Post)      | 12.95                      |
| Krishnaswamy <i>et al.</i> , 2012 <sup>[79]</sup> | 26 Dec 2004  | Malaysia        | Dec 2004            | 18-70+                      | 299         | Community         | Residents              | CIS-R                                               | ...                    | ...                        |
| Kristensen <i>et al.</i> , 2009 <sup>[80]</sup>   | 26 Dec 2004  | South-east Asia | Mar - Nov 2007      | 20-62                       | 32          | Community         | Tourists (Norway)      | ICG; IES-R; GHQ-12; GHQ-28 (Suicide); PTSS-10; WSAS | Offline (By Post)      | 100                        |
| Kristensen <i>et al.</i> , 2010 <sup>[82]</sup>   | 26 Dec 2004  | South-east Asia | Mar - Jun 2007      | 19-80                       | 130         | Community         | Tourists (Norway)      | ICG, CSSS                                           | Online                 | 100                        |
| Kristensen <i>et al.</i> , 2015 <sup>[81]</sup>   | 26 Dec 2004  | South-east Asia | Dec 2006            | 24-79                       | 94          | Community         | Tourists (Norway)      | MINI 5.0.0; 19-item ICG; WSAS; DSM-IV               | Offline                | 100                        |
| Kumar <i>et al.</i> , 2007 <sup>[53]</sup>        | 26 Dec 2004  | India           | Feb 2005            | 18-76                       | 314         | Community         | Residents              | HTQ; DSM-IV                                         | Offline                | 32.8                       |
| Laurito <i>et al.</i> , 2022 <sup>[82]</sup>      | 26 Dec 2004  | Indonesia       | May 2005 - Jun 2006 | 25-99                       | 12447       | Community         | Residents              | PCL-C                                               | Offline                | ...                        |
| Lee <i>et al.</i> , 2015 <sup>[83]</sup>          | 26 Dec 2004  | Indonesia       | ...                 | 5-14                        | 138         | Community         | Residents              | BIS                                                 | Offline                | 5.8                        |
| Levy <i>et al.</i> , 2008 <sup>[84]</sup>         | 26 Dec 2004  | Sri Lanka       | Jun 2005            | ...                         | 264         | Community         | Residents              | ASQ; PSS-I; DSM-IV                                  | ...                    | 65                         |
| Lommen <i>et al.</i> , 2006 <sup>[85]</sup>       | 26 Dec 2004  | Sri Lanka       | Mar - Apr 2006      | 18-68                       | 113         | Community         | Residents              | PDS; IPSI; RRQ; SSQSR                               | Offline                | ...                        |
| Marres <i>et al.</i> , 2011 <sup>[90]</sup>       | 26 Dec 2004  | South-east Asia | Jan 2005            | 18-60+                      | 144         | Community         | Tourists (Netherlands) | SCL-90-R; IES; BDI-II                               | Online (Web Service)   | 21.5                       |
| Marthoenis <i>et al.</i> , 2018 <sup>[91]</sup>   | 26 Dec 2004  | Indonesia       | ...                 | ...                         | 266         | College           | Residents              | PHQ-9; GAD-7                                        | Offline                | ...                        |
| Math <i>et al.</i> , 2006 <sup>[51]</sup>         | 26 Dec 2004  | India           | Jan - Feb 2005      | ...                         | ...         | Community         | Residents              | Non-structured Questionnaire, based on ICD-10       | ...                    | ...                        |

Contd...

**Supplementary Table 4: Contd...**

| First author                                       | Event period | Study country   | Study period   | Age of participants (years) | Sample size | Study setting | Study participants | Instruments used <sup>1</sup>           | Mode of administration | Witnessed death of kin (%) |
|----------------------------------------------------|--------------|-----------------|----------------|-----------------------------|-------------|---------------|--------------------|-----------------------------------------|------------------------|----------------------------|
| Math <i>et al.</i> , 2008a <sup>[49]</sup>         | 26 Dec 2004  | India           | Mar 2005       | <18                         | 37          | Community     | Residents          | ICD-10 diagnostic criteria              | Offline                | ...                        |
| Math <i>et al.</i> , 2008b <sup>[48]</sup>         | 26 Dec 2004  | India           | Jan - Mar 2005 | <18-60+                     | 475         | Community     | Residents          | ICD-10                                  | Offline                | ...                        |
| Meynard <i>et al.</i> , 2008 <sup>[57]</sup>       | 26 Dec 2004  | Indonesia       | Feb 2005       | 0.5-15                      | 654         | Community     | Residents          | Survey                                  | .                      | 13.5                       |
| Michélsen <i>et al.</i> , 2017 <sup>[94]</sup>     | 26 Dec 2004  | South-east Asia | Dec 2010       | 16-55+                      | 848         | Community     | Tourists (Norway)  | GHQ-12; IES-R; PTGI                     | Offline (By Post)      | 14                         |
| Musa <i>et al.</i> , 2014 <sup>[95]</sup>          | 26 Dec 2004  | Indonesia       | ...            | 12-75                       | 200         | Community     | Residents          | DASS-21                                 | Offline                | ...                        |
| Neuner <i>et al.</i> , 2006 <sup>[96]</sup>        | 26 Dec 2004  | Sri Lanka       | Jan 2005       | 8-14                        | 264         | Community     | Residents          | PTSD-RI; DSM-IV                         | Offline                | 4.5                        |
| Nomura <i>et al.</i> , 2010 <sup>[62]</sup>        | 26 Dec 2004  | Sri Lanka       | Apr - Jun 2008 | 18-76                       | 90          | Community     | Residents          | IES-R                                   | Offline                | 38.9                       |
| Nygaard & Heir, 2012 <sup>[101]</sup>              | 26 Dec 2004  | South-east Asia | Jun 2005       | ...                         | 574         | Community     | Tourists (Norway)  | CVVAS-LLS; WAS; IES-R                   | Offline (By Post)      | ...                        |
| Nygaard <i>et al.</i> , 2011 <sup>[100]</sup>      | 26 Dec 2004  | South-east Asia | Jun 2005       | 18+                         | 641         | Community     | Tourists (Norway)  | IES-R; DSM-IV                           | Offline (By Post)      | 8.7                        |
| Nygaard <i>et al.</i> , 2012 <sup>[98]</sup>       | 26 Dec 2004  | South-east Asia | Oct 2005       | 6.5-17.5                    | 133         | Community     | Tourists (Norway)  | PTSD-RI; SDQ                            | Offline (By Post)      | ...                        |
| Nygaard <i>et al.</i> , 2010 <sup>[99]</sup>       | 26 Dec 2004  | South-east Asia | Oct 2005       | 6-18                        | 76          | Community     | Tourists (Norway)  | PTSD-RI                                 | Offline (Face)         | 5                          |
| Nygaard <i>et al.</i> , 2016 <sup>[97]</sup>       | 26 Dec 2004  | South-east Asia | Jun 2005       | 18+                         | 617         | Community     | Tourists (Norway)  | GPSES; IES-R                            | Offline (By Post)      | 8.6                        |
| Pairojkul <i>et al.</i> , 2010 <sup>[103]</sup>    | 26 Dec 2004  | Thailand        | Jan - Mar 2005 | ...                         | 1042        | School        | Residents          | WBFPs                                   | Offline                | ...                        |
| Piyaratstian <i>et al.</i> , 2007 <sup>[104]</sup> | 26 Dec 2004  | Thailand        | Feb 2005       | 9-15                        | 160         | School        | Residents          | CRIES-13                                | Offline                | 25.6                       |
| Piyasil <i>et al.</i> , 2007 <sup>[105]</sup>      | 26 Dec 2004  | Thailand        | Jan - Feb 2005 | ...                         | 316         | School        | Residents          | PSC, CDI, CRIES                         | Offline                | 54.1                       |
| Piyasil <i>et al.</i> , 2008 <sup>[106]</sup>      | 26 Dec 2004  | Thailand        | Jan - Dec 2005 | ...                         | 1364        | School        | Residents          | CRIES, PTSD Checklist; CDI              | Offline                | ...                        |
| Piyasil <i>et al.</i> , 2011 <sup>[107]</sup>      | 26 Dec 2004  | Thailand        | Feb 2005       | ...                         | 1625        | School        | Residents          | CDI; CRIES-8; DSM-IV                    | Offline                | 3                          |
| Piyavhatkul <i>et al.</i> , 2008 <sup>[108]</sup>  | 26 Dec 2004  | Thailand        | Oct 2005       | 1-18                        | 94          | Community     | Residents          | DSM-IV                                  | Offline                | 69.1                       |
| Ponnampuruma & Nicolson, 2018 <sup>[109]</sup>     | 26 Dec 2004  | Sri Lanka       | Jan - Mar 2008 | 12-16                       | 753         | School        | Residents          | LDQ-Y; UCLA-PTSD-RI; Extended SDQ; MSPS | Offline                | ...                        |
| Prueksartanon & Kongsakol, 2007 <sup>[110]</sup>   | 26 Dec 2004  | Thailand        | Jul 2005       | 60-93                       | 87          | Community     | Residents          | ZSDS                                    | Offline                | ...                        |
| Pyari <i>et al.</i> , 2012 <sup>[111]</sup>        | 26 Dec 2004  | India           | Jun - Oct 2005 | 9-81                        | 299         | Community     | Residents          | IES-R                                   | Offline                | 39.1                       |
| Rajkumar <i>et al.</i> , 2011 <sup>[156]</sup>     | 26 Dec 2004  | India           | Sep 2005       | 16+                         | 643         | Community     | Residents          | IES-R; CGAS                             | Offline                | 54.4                       |
| Rajkumar <i>et al.</i> , 2015 <sup>[112]</sup>     | 26 Dec 2004  | India           | Sep 2005       | 12-50                       | 643         | Community     | Residents          | IES, DSM-5                              | Offline                | 54.6                       |
| Ramasinghe & Levy, 2007 <sup>[113]</sup>           | 26 Dec 2004  | Sri Lanka       | Jun 2005       | 16+                         | 264         | Community     | Residents          | PSS-1; DSM-IV; CES-D; MOS-SS            | Offline                | 62.5                       |
| Rosendal <i>et al.</i> , 2011 <sup>[115]</sup>     | 26 Dec 2004  | Indonesia       | Oct 2005       | 18-81                       | 660         | Community     | Tourists (Denmark) | (PCL; DSM-IV; MDI                       | Offline (By Post)      | ...                        |
| Rosendal <i>et al.</i> , 2014 <sup>[114]</sup>     | 26 Dec 2004  | South-east Asia | Oct 2005       | 18-82                       | 635         | Community     | Tourists (Denmark) | PCL; DSM-IV                             | Offline (By Post)      | 3.6                        |
| Sattler <i>et al.</i> , 2014 <sup>[117]</sup>      | 26 Dec 2004  | Thailand        | Mar 2005       | 18-72                       | 248         | Community     | Residents          | IES-R; SSI; FCOPEs; PTGI                | Offline                | ...                        |
| Siqveld <i>et al.</i> , 2015 <sup>[119]</sup>      | 26 Dec 2004  | Thailand        | Jun 2007       | 18+                         | 58          | Community     | Tourists (Norway)  | PTGI; PCL; GHQ-28; WHOQOL-Bref          | Offline                | 20.7                       |
| Souza <i>et al.</i> , 2007 <sup>[120]</sup>        | 26 Dec 2004  | Indonesia       | Jul 2005       | 16+                         | 262         | Community     | Residents          | HSLC-25; DSM-IV                         | Offline                | 34.4                       |

Contd...

**Supplementary Table 4: Contd...**

| First author                                        | Event period | Study country   | Study period   | Age of participants (years) | Sample size | Study setting | Study participants     | Instruments used <sup>1</sup>                     | Mode of administration | Witnessed death of kin (%) |
|-----------------------------------------------------|--------------|-----------------|----------------|-----------------------------|-------------|---------------|------------------------|---------------------------------------------------|------------------------|----------------------------|
| Soysa, 2013 <sup>[121]</sup>                        | 26 Dec 2004  | Sri Lanka       | Mar 2005       | 12-14                       | 60          | Community     | Residents              | HTQ; DSM-IV                                       | Offline                | ...                        |
| Suar <i>et al.</i> , 2015 <sup>[122]</sup>          | 26 Dec 2004  | India           | Mar 2006       | 20-86                       | 416         | Community     | Residents              | DSM-IV; BDI; STAI; GHQ-12                         | Offline                | 37.5                       |
| Sveen <i>et al.</i> , 2018 <sup>[124]</sup>         | 26 Dec 2004  | South-east Asia | Feb 2006       | ...                         | 170         | Community     | Tourists (Sweden)      | IES-R; ICG, CSS                                   | Offline (By Post)      | ...                        |
| Tang, 2006 <sup>[125]</sup>                         | 26 Dec 2004  | Thailand        | Jun 2005       | 18-68                       | 267         | Community     | Residents              | GHQ; BCSI; PTGI                                   | Offline                | 67.4                       |
| Telles <i>et al.</i> , 2007 <sup>[126]</sup>        | 26 Dec 2004  | India           | Jan 2005       | 28-50                       | 47          | Community     | Residents              | 10 cm VAS                                         | Offline                | ...                        |
| Thavichachart <i>et al.</i> , 2009 <sup>[146]</sup> | 26 Dec 2004  | Thailand        | Feb - Mar 2005 | 18+                         | 3133        | Community     | Residents              | DTS; BDI; SCL 90; MPI; BCS                        | ...                    | 49.3                       |
| Thienkrua <i>et al.</i> , 2006 <sup>[129]</sup>     | 26 Dec 2004  | Thailand        | Feb 2005       | 7-14                        | 266         | Community     | Residents              | UCLA-PTSD-RI (Child version); BDSRS; PysSTART RTS | Offline                | 68.8                       |
| Ulaminnon <i>et al.</i> , 2008 <sup>[131]</sup>     | 26 Dec 2004  | Thailand        | Dec 2007       | ...                         | 45          | School        | Residents              | DSM-IV                                            | Offline                | 80                         |
| Uttervall <i>et al.</i> , 2014 <sup>[132]</sup>     | 26 Dec 2004  | South-east Asia | Jul 2006       | 16-19                       | 293         | Community     | Tourists (Norway)      | GHQ-12                                            | Offline (By Post)      | ...                        |
| Van Griensven <i>et al.</i> , 2006 <sup>[8]</sup>   | 26 Dec 2004  | Thailand        | Feb 2005       | 15-55+                      | 1061        | Community     | Residents              | HTQ, HSCL-25; SF-36                               | Offline                | 30.6                       |
| Vetter <i>et al.</i> , 2008 <sup>[133]</sup>        | 26 Dec 2004  | South-east Asia | Feb 2005       | 17-75                       | 2269        | Community     | Tourists (Switzerland) | PTSS-10                                           | Online (Web Service)   | 9.4                        |
| Vetter <i>et al.</i> , 2011 <sup>[134]</sup>        | 26 Dec 2004  | South-east Asia | Feb - Aug 2005 | ...                         | 1207        | Community     | Tourists (Switzerland) | ONSET; PTSS-10; DSM-IV                            | Online (Web Service)   | ...                        |
| Vijayakumar & Kumar, 2008 <sup>[147]</sup>          | 26 Dec 2004  | India           | Mar 2005       | 18+                         | 102         | Community     | Residents              | BDI; GHQ-12; PTSD Scale                           | Offline                | 100                        |
| Vijayakumar <i>et al.</i> , 2006 <sup>[150]</sup>   | 26 Dec 2004  | India           | Nov 2005       | 11-14                       | 230         | Community     | Residents              | DSM-IV; CBCL; CPTSD-RI                            | Offline                | 7.8                        |
| Viswanath <i>et al.</i> , 2012 <sup>[136]</sup>     | 26 Dec 2004  | India           | Jan 2005       | 19-60+                      | 438         | Community     | Residents              | ICD-10                                            | Offline                | ...                        |
| Viswanath <i>et al.</i> , 2013 <sup>[135]</sup>     | 26 Dec 2004  | India           | Mar 2005       | ...                         | 475         | Hospital      | Residents              | ICD-10                                            | Offline                | ...                        |
| Wahlström <i>et al.</i> , 2010 <sup>[140]</sup>     | 26 Dec 2004  | South-east Asia | Feb 2006       | 16-55                       | 1505        | Community     | Tourists (Sweden)      | IES-R; GHQ-12; DSM-IV                             | Offline (By Post)      | 3.4                        |
| Wahlström <i>et al.</i> , 2008 <sup>[139]</sup>     | 26 Dec 2004  | South-east Asia | Feb 2006       | 16-55+                      | 1505        | Community     | Tourists (Norway)      | GHQ-12, IES-R                                     | Offline (By Post)      | ...                        |
| Wahlström <i>et al.</i> , 2013a <sup>[137]</sup>    | 26 Dec 2004  | South-east Asia | Feb 2006       | 16+                         | 1505        | Community     | Tourists (Norway)      | GHQ-12, IES-R, CSS                                | ...                    | ...                        |
| Wahlström <i>et al.</i> , 2013b <sup>[138]</sup>    | 26 Dec 2004  | South-east Asia | Feb 2006       | 16+                         | 1101        | Community     | Tourists (Norway)      | GHQ-12, IES-R                                     | Offline (By Post)      | ...                        |
| Wickrama & Wickrama, 2008 <sup>[141]</sup>          | 26 Dec 2004  | Sri Lanka       | Apr 2005       | ...                         | 318         | Community     | Residents              | DSM-IV; CES-D; YSR                                | Offline                | ...                        |
| Wickrama & Wickrama, 2011 <sup>[142]</sup>          | 26 Dec 2004  | Sri Lanka       | Mar 2005       | ...                         | 318         | Community     | Residents              | CES-D                                             | Offline                | ...                        |
| Wickrama & Kaspar, 2007 <sup>[155]</sup>            | 26 Dec 2004  | Sri Lanka       | Apr 2005       | 12-19                       | 325         | Community     | Residents              | DSM-IV; CES-D; YSR                                | Offline (Face-to-face) | ...                        |
|                                                     | 26 Dec 2004  | Sri Lanka       | Apr 2005       | ...                         | 325         | ...           | Residents              | DSM-IV; CES-D; YSR                                | Offline (Face-to-face) | ...                        |

Contd...

**Supplementary Table 4: Contd...**

| First author                                  | Event period | Study country | Study period        | Age of participants (years) | Sample size | Study participants  | Instruments used <sup>1</sup> | Mode of administration | Witnessed death of kin (%) |
|-----------------------------------------------|--------------|---------------|---------------------|-----------------------------|-------------|---------------------|-------------------------------|------------------------|----------------------------|
| Wiguna <i>et al.</i> , 2010 <sup>[43]</sup>   | 26 Dec 2004  | Indonesia     | Mar 2005 - Jan 2006 | 4-18                        | 2135        | Community Residents | SDQ; DSM-IV                   | Offline                | ...                        |
| Aneelraj <i>et al.</i> , 2015 <sup>[18]</sup> | Jun 2013     | India         | Jul - Aug 2013      | 5-19                        | 200         | Community Residents | IES, ICD-10                   | Offline                | ...                        |

<sup>1</sup>12-item LEI; 12-item Life Events Inventory; ASQ: Attributional Style Questionnaire; BAI: Beck's Anxiety Inventory; BCS: Brief Coping Strategies Inventory; BDI: Beck Depression Inventory; BDRS: Brief Depression Self-Rating Scale; BFI: Big Five Inventory; BGAS-PTSD: Brief Global Assessment Scale for Posttraumatic Stress Disorder; BIS: Brief Impairment Scale; BSRS-5: 5-item Brief Symptom Rating Scale; CBCL: Child Behaviour Check List; CBCL-PTSD-TR: Child Behaviour Check-list Post Traumatic Stress Disorder Scale-Tamil Revised; CDI: Childhood Depressive Inventory; Inventory; CDIS: Child Diagnostic Interview Schedule; CDR: Connor-Davidson Resilience Scale-2; CES-D: Center for Epidemiological Studies Depression Scale; CGAS: Complicated Grief Assessment Scale; CIS-R: Clinical Interview Schedule-Revised; CLL: Cantrill's Ladder of Life; CLLS: Cantrill's Ladder of Life Satisfaction; CPSS: Child PTSD Symptom Scale; CPTSD-RI: Child Post-Traumatic Stress Reaction Index; Rating Scale Revised (Short Version); CVVAS-LLS: Cantrill's vertical visual-analog scale Ladder of Life Satisfaction; DASS 21: Depression, Anxiety and Stress Scale 21; DPS: Diagnostic Predictive Scales; DSM-5-TR Level 1 CCSM: DSM-5 self-rated level 1 Cross-Cutting Symptom Measure; DSM-IV TR: Diagnostic and Statistical Manual of Mental Disorders, Fourth Edition Text Revision; DSM-IV: Diagnostic and Statistical Manual of Mental Disorders, Fourth Edition; DTS: Davidson Trauma Scale; EBS: Environmental Behavior Scale; FCOPEs: Family Crisis Oriented Personal Evaluation Scale; FFMQ: Five-Facet Mindfulness Questionnaire; FSSC-R: Fear Survey Schedule for Children Revised; GHQ: General Health Questionnaire; GPSES: General Perceived Self-Efficacy Scale; GSES: General Self-Efficacy Scale; HADS: Hospital Anxiety and Depression Scale; HRSS: Holmes and Rahe Stress Scale; HS: Hopelessness Scale; HSCL-25: Hopkins Symptom Checklist-25; HTQ: Harvard Trauma Questionnaire; ICD-10: International Classification of Diseases, Tenth Revision; ICD-10-DCR: International Classification of Mental and Behavioural Disorders (10<sup>th</sup> Revision); Diagnostic Criteria for Research; ICG: Inventory of Complicated Grief; IELCS: Internal-External Locus of Control Scale; IES: Impact of Event Scale; IES-R: Impact of Event Scale (Revised); IPSI: Interpretation of PTSD Symptoms Inventory; K10-SMI: Kessler 10 Serious Mental Illness; LDQ-Y: Long-Term Difficulties Questionnaire for Youth; LHS: Learned Helplessness Scale; LTE-Q: List of Threatening Experiences, questionnaire version; MDI: Major Depression Inventory; MINI: Mini International Neuropsychiatric Interview 5.0.0; MOS-SS: Medical Outcomes Study Social Support Survey; MPI: Maudsley Personality Inventory; MSPS: Multidimensional Scale of Perceived Social Support; NMRSC-121: Neuropsychiatric Interview 5.0.0; MOS-SS: Medical Outcomes Study Social Support Survey; PCL-C: PTSD Checklist-Civilian Version; PCL-S: Posttraumatic Stress Disorder Checklist; PC-PTSD-5: Primary Care PTSD Screen for DSM 5; PDS: Post-traumatic Stress Diagnostic Scale; PRCRS: Parent Report of the Child's Reaction to Stress; PSC: Pediatric Symptom Checklist; PSLES: Presumptive Stressful Life Events Scale; PSQ: Psychosis Screening Questionnaire; PSS-I: PTSD Symptom Scale-Interview version; PSSS: Perceived Social Support Scale; PSS-SR: Post-traumatic Stress Symptom Scale-Self-Report Version; PsySTART RTS: PsySTART Rapid Triage System; PTGI: Posttraumatic Growth Inventory; PTGLC-R: PTG Inventory for Children-Revised; PTSD Checklist: Post traumatic stress disorder checklist; PTSD-RI: PTSD Reaction Index; PTSS-10: Posttraumatic Stress Scale 10-item Version; PWQ: Psychological Well-being Scale; RRSQ: Ruminative-Reflection Questionnaire; SARS-R: Social Adjustment Rating Scale (Revised); SCID-I: Structured Clinical Interview for DSM-IV Axis I Disorders; SCL 90: Symptom Check List 90; SCL-90-R: Symptom Checklist 90; SDQ: Strengths and Difficulties Questionnaire; SF-36: Short Form-36; SQD: Screening Questionnaire for Disaster Mental Health; SRH: Self-rated Health; SRQ: Self-Reporting questionnaire; SRQ-20: Self-Reporting Questionnaire 20; SRS-PTSD: Self-Rating scale for PTSD; SS: Suicidality Screening; SSI: Social Support Index; SSMCS: Simple Scale to Measure Coping Styles; SSOQR: Social Support Questionnaire (Short Form); STAI: State-Trait Anxiety Inventory; TAI: 20-item Trait Anxiety Inventory; TESS: Traumatic Exposure Severity Scale; TESS-DS: TESS-Distress Scales; TESS-OS: TESS-Occurrence Scales; TSSC: Trauma Symptom Checklist for Children; TSQ-10: Trauma Screening Questionnaire; UCLA-PTSD-RI: University of California Los Angeles PTSD Reaction Index for DSM-IV; VAS: Visual Analogue Scale; WAS: World Assumptions Scale; WASi: Wechsler Adult Short Intelligence Test; WBFPS: Wong-Baker Faces Pain Scale; WHO-5: World Health Organization-Five Well-Being Scale; WHOQOL-Bref: World Health Organization Quality of Life-Bref scale; WSAS: Work and Social Adjustment Scale; YSR: Youth Self Report; ZSAS: Zung self-Rating Anxiety Scale; ZSDS: Zung Self-Rating Depression Scale
