# Supplementary material for: Mental health burden following extreme weather events in South-east Asia: A systematic review and meta-analysis
Source: PubMed Central journal article supplement — Indian J Psychiatry. 2024 Aug 19;66(8):683–94. doi: 10.4103/indianjpsychiatry.indianjpsychiatry_348_24 (PMC11469557; doi:10.4103/indianjpsychiatry.indianjpsychiatry_348_24), 2024-08-19
Supplement: IJPsy-66-683_Suppl2.pdf [file IJPsy-66-683_Suppl2.pdf]

**Supplementary Table 5: Characteristics of the selected studies according to different MH illnesses (n=155)**

| First author                          | Age Mean±SD | Burden of MH (%) | Psychological Distress Score (GHQ12) Mean±SD | IES-R Score Mean±SD | Anxiety±SD (%) | Depression±SD (%) | Stress % | PTSD±SD (%)      |
|---------------------------------------|-------------|------------------|----------------------------------------------|---------------------|----------------|-------------------|----------|------------------|
| <b>Studies on Cyclone</b>             |             |                  |                                              |                     |                |                   |          |                  |
| Kar <i>et al.</i> , 2004              | 39.96±14.45 | 80.4             | ...                                          | ...                 | (57.6)         | (52.8)            | ...      | (44.3)           |
| Kar <i>et al.</i> , 2006              | 14.2±0.74   | ...              | ...                                          | ...                 | (12.0)         | (17.6)            | ...      | (26.9)           |
| Kar <i>et al.</i> , 2007              | 12.9±1.83   | ...              | ...                                          | ...                 | (14.5)         | ...               | ...      | (30.6)           |
| Suar <i>et al.</i> , 2002             | 38.0±14.1   | ...              | ...                                          | ...                 | 20.32±4.46     | 20.11±3.72        | ...      | 7.51±1.83 (89.0) |
| Kim <i>et al.</i> , 2010              | 36.0±22.1   | 9.0              | ...                                          | ...                 | ...            | ...               | 2.2      | (5.4)            |
| Hanć <i>et al.</i> , 2022             | ...         | ...              | ...                                          | ...                 | ...            | ...               | ...      | ...              |
| Mamun <i>et al.</i> , 2019            | 40.1±13.6   | ...              | ...                                          | ...                 | ...            | (64.9)            | ...      | ...              |
| Kar <i>et al.</i> , 2021              | 50.5±9.63   | ...              | ...                                          | ...                 | (99)           | (65)              | ...      | (42.9)           |
| Hossain <i>et al.</i> , 2021          | 37.0±12.6   | ...              | ...                                          | ...                 | (95)           | (82)              | ...      | ...              |
| <b>Studies on Flood</b>               |             |                  |                                              |                     |                |                   |          |                  |
| Kaiser, 2023                          | ...         | ...              | ...                                          | ...                 | (93.8)         | (75)              | 93.8     | ...              |
| Mathew, 2021                          | 37.8±8.9    | ...              | ...                                          | ...                 | ...            | ...               | ...      | ...              |
| Wahid <i>et al.</i> , 2023            | ...         | ...              | ...                                          | ...                 | ...            | ...               | ...      | ...              |
| Joy <i>et al.</i> , 2021              | 38.26       | ...              | ...                                          | ...                 | ...            | ...               | ...      | ...              |
| Amarnath <i>et al.</i> , 2016         | ...         | 11.5             | ...                                          | ...                 | (10.8)         | ...               | ...      | ...              |
| Ishikawa <i>et al.</i> , 2013         | 58.6±12.5   | ...              | ...                                          | ...                 | ...            | (1.6)             | ...      | (0.6)            |
| Asim <i>et al.</i> , 2022             | 46.0±15.2   | ...              | ...                                          | ...                 | ...            | ...               | ...      | 7.2±5.6 (89.5)   |
| Haris <i>et al.</i> , 2020            | ...         | 14.5             | ...                                          | ...                 | ...            | ...               | ...      | ...              |
| Channaveerachari <i>et al.</i> , 2015 | 30.3±17.9   | ...              | ...                                          | ...                 | (3.7)          | (3.3)             | ...      | (0.2)            |
| Telles <i>et al.</i> , 2009           | 34.1±12.9   | ...              | ...                                          | ...                 | ...            | 3.41±1.36         | ...      | 4.69±2.13        |
| Mahmud <i>et al.</i> , 2021           | ...         | ...              | ...                                          | ...                 | 0.54 (100)     | (98.1)            | ...      | 0.53 (100)       |
| Oba <i>et al.</i> , 2010              | ...         | ...              | ...                                          | ...                 | 10.83±5.31     | 5.89±2.16         | ...      | ...              |
| Yoda <i>et al.</i> , 2017             | 36.85±14.5  | ...              | ...                                          | ...                 | ...            | ...               | ...      | ...              |
| Hassan <i>et al.</i> , 2018           | 14.61±1.06  | ...              | ...                                          | ...                 | ...            | ...               | ...      | ...              |
| Mathew <i>et al.</i> , 2021           | 16.03±0.73  | ...              | ...                                          | ...                 | ...            | ...               | ...      | (34.9)           |
| Telles <i>et al.</i> , 2010           | 31.5±7.5    | ...              | ...                                          | ...                 | ...            | ...               | ...      | ...              |
| Thomas <i>et al.</i> , 2021           | ...         | ...              | ...                                          | ...                 | (31)           | (33)              | ...      | ...              |
| Ma <i>et al.</i> , 2019               | 56.5±2.5    | ...              | ...                                          | ...                 | ...            | ...               | ...      | ...              |
| Bandla <i>et al.</i> , 2019           | ...         | 45.3             | ...                                          | ...                 | (27.4)         | (45.3)            | ...      | (26.9)           |
| Wind <i>et al.</i> , 2013             | 46.03±15.74 | ...              | ...                                          | ...                 | 2.52±0.63      | 2.48±0.4          | ...      | ...              |
| Wind <i>et al.</i> , 2014             | 46.03±15.74 | ...              | ...                                          | ...                 | 2.52±0.63      | 2.48±0.4          | ...      | ...              |
| Sanguanklin <i>et al.</i> , 2014      | 29.57±5.05  | ...              | ...                                          | ...                 | ...            | (34.9)            | ...      | ...              |
| Mamun <i>et al.</i> , 2021            | 45.53±14.85 | ...              | ...                                          | ...                 | (44.3)         | (65.2)            | ...      | (82.8)           |
| Assanangkornchai <i>et al.</i> , 2004 | 49.9±16.5   | 40.0             | ...                                          | 13.4±8.2            | ...            | ...               | ...      | ...              |
| Assanangkornchai <i>et al.</i> , 2007 | ...         | 39.49            | ...                                          | 13.4±8.2            | ...            | ...               | ...      | ...              |
| Dar <i>et al.</i> , 2018              | 34.7±3.6    | ...              | ...                                          | ...                 | ...            | 36.86±3.08        | ...      | ...              |
| Singh & Verma, 2023                   | ...         | ...              | ...                                          | 39.31               | ...            | ...               | ...      | ...              |
| <b>Studies on Tsunami</b>             |             |                  |                                              |                     |                |                   |          |                  |
| Adebäck <i>et al.</i> , 2021          | ...         | ...              | 23.7±5.3                                     | ...                 | ...            | ...               | ...      | 51.6±20.6        |
| Adebäck <i>et al.</i> , 2018          | ...         | 25               | ...                                          | ...                 | (52)           | (11)              | ...      | (17)             |
| Agampodi <i>et al.</i> , 2011         | 14.8±0.8)   | 32.2             | ...                                          | ...                 | ...            | ...               | ...      | ...              |
| Agustini <i>et al.</i> , 2011         | 14.4±1.7    | ...              | ...                                          | ...                 | ...            | ...               | ...      | 28.9±12.8 (63.1) |
| Arnberg <i>et al.</i> , 2012          | 40.7±14.4   | ...              | 11.2±5.6                                     | 18.6±17.4           | ...            | ...               | ...      | ...              |
| Arnberg <i>et al.</i> , 2013          | 49.7±13.1   | ...              | ...                                          | ...                 | ...            | (2.8)             | ...      | (4.2)            |
| Arnberg <i>et al.</i> , 2014          | ...         | ...              | 2.4±3.8                                      | 23±18.4             | ...            | (21)              | ...      | (8.6)            |
| Arnberg <i>et al.</i> , 2015          | ...         | 6.4              | ...                                          | ...                 | (1.6)          | (1.7)             | 2.9      | (0.4)            |
| Baddam John <i>et al.</i> , 2007      | 12.9±2.7    | ...              | ...                                          | ...                 | ...            | ...               | ...      | (70.7)           |
| Banford <i>et al.</i> , 2016          | 43.6        | ...              | ...                                          | ...                 | ...            | ...               | ...      | 0.13±0.1         |
| Becker, 2009                          | ...         | 54               | ...                                          | 25.16±12.18         | ...            | ...               | ...      | ...              |
| Berger & Gelkopf, 2009                | ...         | ...              | ...                                          | ...                 | ...            | 4.24±3.25         | ...      | 46.09±7.95       |
| Bondjers <i>et al.</i> , 2018         | 42.7±14.0   | ...              | ...                                          | 33.2±6.5            | ...            | ...               | ...      | ...              |
| Chaiphalsarisdi, 2008                 | 35          | ...              | ...                                          | ...                 | ...            | ...               | ...      | ...              |
| Dawson & Bryant, 2016                 | 10.43±1.38  | ...              | ...                                          | ...                 | ...            | ...               | ...      | (48)             |
| Descilo <i>et al.</i> , 2009          | ...         | ...              | ...                                          | ...                 | ...            | 27.2              | ...      | 66.2             |
| Du <i>et al.</i> , 2012               | 9.5         | ...              | ...                                          | ...                 | ...            | ...               | ...      | ...              |
| Dyb <i>et al.</i> , 2011              | 12.0±3.5    | ...              | ...                                          | ...                 | ...            | ...               | ...      | 6.1±7.6 (78.1)   |
| Dyster-Aas <i>et al.</i> , 2012       | ...         | ...              | ...                                          | 29±18.8             | ...            | ...               | ...      | ...              |
| Exenberger <i>et al.</i> , 2016       | 11.89±2.54  | ...              | ...                                          | ...                 | ...            | ...               | ...      | ...              |

Contd...

Supplementary Table 5: Contd...

| First author                        | Age Mean±SD | Burden of MH (%) | Psychological Distress Score (GHQ12) Mean±SD | IES-R Score Mean±SD | Anxiety±SD (%)  | Depression±SD (%) | Stress % | PTSD±SD (%)     |
|-------------------------------------|-------------|------------------|----------------------------------------------|---------------------|-----------------|-------------------|----------|-----------------|
| Exenberger <i>et al.</i> , 2019     | 11.7±2.6    | ...              | ...                                          | ...                 | ...             | ...               | ...      | (12.8)          |
| Faisal & Zulfa, 2004                | ...         | ...              | ...                                          | ...                 | (20.2)          | ...               | ...      | (20.6)          |
| Frankenberg <i>et al.</i> , 2012    | ...         | ...              | ...                                          | ...                 | ...             | ...               | ...      | ...             |
| Frankenberg <i>et al.</i> , 2008    | 35.6±14.9   | ...              | ...                                          | ...                 | ...             | ...               | ...      | 4.24±3.58       |
| George <i>et al.</i> , 2012         | 39.2±13.4   | 64               | ...                                          | ...                 | ...             | ...               | ...      | ...             |
| Gudmundsdottir <i>et al.</i> , 2018 | ...         | ...              | 1.75±3.21                                    | 18.15±17.21         | ...             | ...               | ...      | ...             |
| Gunaratne <i>et al.</i> , 2014      | 39.9±15.3   | ...              | ...                                          | ...                 | (42)            | ...               | 55       | (20)            |
| Hagen <i>et al.</i> , 2016          | 48±10.8     | ...              | ...                                          | 12.9±12.9           | ...             | ...               | ...      | ...             |
| Heir & Weisaeth, 2008               | 43.5        | 41.4             | ...                                          | ...                 | ...             | ...               | ...      | ...             |
| Heir <i>et al.</i> , 2009a          | 44.2        | ...              | ...                                          | 25.43±17.5          | ...             | ...               | ...      | ...             |
| Heir <i>et al.</i> , 2009b          | ...         | ...              | ...                                          | ...                 | ...             | ...               | ...      | ...             |
| Heir <i>et al.</i> , 2010           | 43.4        | 22.4             | ...                                          | ...                 | ...             | ...               | ...      | ...             |
| Heir <i>et al.</i> , 2011           | ...         | ...              | ...                                          | 1.27±0.44           | ...             | ...               | ...      | ...             |
| Heir <i>et al.</i> , 2011           | ...         | ...              | ...                                          | ...                 | ...             | ...               | ...      | ...             |
| Heir <i>et al.</i> , 2011           | ...         | ...              | ...                                          | 0.99±0.79           | ...             | ...               | ...      | ...             |
| Heir <i>et al.</i> , 2021           | 44.6±13.5   | ...              | ...                                          | ...                 | ...             | ...               | ...      | ...             |
| Hollifield <i>et al.</i> , 2008     | 44.5±16.3   | ...              | ...                                          | ...                 | 15.9±6.5 (30.3) | 21.6±7.2 (15.7)   | ...      | 6.9±7.7 (24.7)  |
| Hussain <i>et al.</i> , 2011        | 45.0±12.9   | ...              | ...                                          | 22.35±18.7          | ...             | ...               | ...      | ...             |
| Hussain <i>et al.</i> , 2013        | 43.5        | ...              | ...                                          | 24.6±18.5           | ...             | ...               | ...      | ...             |
| Irmansyah <i>et al.</i> , 2010      | 34.2±13.4   | ...              | ...                                          | ...                 | ...             | ...               | ...      | 2.08±1.63       |
| Isaranuwachai <i>et al.</i> , 2013  | 39.3±15.3   | ...              | ...                                          | ...                 | ...             | ...               | ...      | ...             |
| Isaranuwachai <i>et al.</i> , 2017  | 39.4±15.3   | ...              | ...                                          | ...                 | ...             | ...               | ...      | ...             |
| Isuru <i>et al.</i> , 2018          | ...         | ...              | ...                                          | ...                 | ...             | (5.6)             | ...      | (0)             |
| Jensen <i>et al.</i> , 2009         | 12.9±3.4    | ...              | ...                                          | ...                 | ...             | ...               | ...      | 14.6±10.1 (1.5) |
| Johannesson <i>et al.</i> , 2009a   | 43.5        | ...              | ...                                          | 18.15               | ...             | ...               | ...      | ...             |
| Johannesson <i>et al.</i> , 2009b   | ...         | ...              | ...                                          | 21.67±17.6          | ...             | ...               | ...      | ...             |
| Johannesson <i>et al.</i> , 2011a   | ...         | 69.0             | ...                                          | ...                 | ...             | ...               | ...      | (46.0)          |
| Johannesson <i>et al.</i> , 2011b   | 42.3        | 22.6             | ...                                          | ...                 | ...             | ...               | ...      | ...             |
| Johannesson <i>et al.</i> , 2015    | 49.5±14.0   | ...              | ...                                          | ...                 | ...             | ...               | ...      | ...             |
| Kar <i>et al.</i> , 2014            | 42.8±14.4   | 77.6             | ...                                          | ...                 | (23.1)          | (33.6)            | ...      | (70.9)          |
| Keraite <i>et al.</i> , 2016        | ...         | ...              | ...                                          | ...                 | ...             | ...               | ...      | ...             |
| Ketumarn <i>et al.</i> , 2009       | ...         | ...              | ...                                          | ...                 | ...             | (0.92)            | ...      | (20.9)          |
| Kongsakon <i>et al.</i> , 2012      | 34          | ...              | ...                                          | ...                 | ...             | ...               | ...      | ...             |
| Kraemer <i>et al.</i> , 2009a       | 46.9±13.8   | ...              | ...                                          | ...                 | (17.5)          | (7.9)             | ...      | (16.1)          |
| Kraemer <i>et al.</i> , 2009b       | 46.7±13.6   | 22.8             | ...                                          | ...                 | ...             | ...               | ...      | 6.2±8.4 (17.3)  |
| Krishnaswamy <i>et al.</i> , 2012   | ...         | ...              | ...                                          | ...                 | ...             | ...               | ...      | ...             |
| Kristensen <i>et al.</i> , 2009     | 44.8        | ...              | 1.68                                         | 1.64                | ...             | (25)              | ...      | (34.4)          |
| Kristensen <i>et al.</i> , 2010     | 45.7        | ...              | ...                                          | ...                 | ...             | ...               | ...      | ...             |
| Kristensen <i>et al.</i> , 2015     | 49.2        | ...              | ...                                          | ...                 | ...             | (12.8)            | ...      | (11.7)          |
| Kumar <i>et al.</i> , 2007          | 35.8±14.0   | ...              | ...                                          | ...                 | ...             | ...               | ...      | (12.7)          |
| Laurito <i>et al.</i> , 2022        | ...         | ...              | ...                                          | ...                 | ...             | ...               | ...      | 5.2±3.6         |
| Lee <i>et al.</i> , 2015            | 9.41±2.17   | ...              | ...                                          | ...                 | ...             | ...               | ...      | ...             |
| Levy <i>et al.</i> , 2008           | 38.0±14.5   | ...              | ...                                          | ...                 | ...             | ...               | ...      | ...             |
| Lommen <i>et al.</i> , 2006         | 35.9±10.1   | ...              | ...                                          | ...                 | ...             | ...               | ...      | (52.2)          |
| Marres <i>et al.</i> , 2011         | ...         | ...              | ...                                          | ...                 | ...             | ...               | ...      | ...             |
| Marthoenis <i>et al.</i> , 2018     | 19.7±1.8    | ...              | ...                                          | ...                 | (27.4)          | (18.8)            | ...      | ...             |
| Math <i>et al.</i> , 2006           | ...         | ...              | ...                                          | ...                 | ...             | ...               | ...      | ...             |
| Math <i>et al.</i> , 2008a          | ...         | ...              | ...                                          | ...                 | ...             | (13.5)            | ...      | (10.8)          |
| Math <i>et al.</i> , 2008b          | ...         | ...              | ...                                          | ...                 | (5.5)           | (21.5)            | 0.6      | (11.2)          |
| Meynard <i>et al.</i> , 2008        | ...         | 35.6             | ...                                          | ...                 | ...             | ...               | ...      | ...             |
| Michélsen <i>et al.</i> , 2017      | ...         | ...              | 22.11±3.43                                   | 21.84±18.28         | ...             | ...               | ...      | 11.3±14.56      |
| Musa <i>et al.</i> , 2014           | ...         | ...              | ...                                          | ...                 | (51.5)          | (19)              | 22       | ...             |
| Neuner <i>et al.</i> , 2006         | 11.1±2.0    | ...              | ...                                          | ...                 | ...             | ...               | ...      | (24.24)         |
| Nomura <i>et al.</i> , 2010         | 70.5±6.7    | ...              | ...                                          | 25.75               | ...             | ...               | ...      | ...             |
| Nygaard & Heir, 2012                | 42.6±12.7   | ...              | ...                                          | 1.1±0.8             | ...             | ...               | ...      | ...             |
| Nygaard <i>et al.</i> , 2011        | 43.4±12.9   | ...              | ...                                          | 1.1±0.83            | ...             | ...               | ...      | ...             |
| Nygaard <i>et al.</i> , 2012        | 12.9±3.4    | ...              | ...                                          | ...                 | ...             | ...               | ...      | 14.6±10.1       |
| Nygaard <i>et al.</i> , 2010        | 12.9±3.2    | ...              | ...                                          | ...                 | ...             | ...               | ...      | 13.5±9.7        |
| Nygaard <i>et al.</i> , 2016        | 43.2±12.8   | ...              | ...                                          | 1.13±0.83           | ...             | ...               | ...      | ...             |

Contd...

**Supplementary Table 5: Contd...**

| First author                       | Age Mean±SD | Burden of MH (%) | Psychological Distress Score (GHQ12) Mean±SD | IES-R Score Mean±SD | Anxiety±SD (%) | Depression±SD (%) | Stress % | PTSD±SD (%)       |
|------------------------------------|-------------|------------------|----------------------------------------------|---------------------|----------------|-------------------|----------|-------------------|
| Pairojkul <i>et al.</i> , 2010     | ...         | ...              | ...                                          | ...                 | ...            | ...               | ...      | ...               |
| Pityaratstian <i>et al.</i> , 2007 | 10.51±1.21  | ...              | ...                                          | ...                 | ...            | ...               | ...      | (38.13)           |
| Piyasil <i>et al.</i> , 2007       | ...         | ...              | ...                                          | ...                 | ...            | ...               | ...      | (57.3)            |
| Piyasil <i>et al.</i> , 2008       | ...         | 6.6              | ...                                          | ...                 | (0.4)          | (1.1)             | ...      | (6.3)             |
| Piyasil <i>et al.</i> , 2011       | ...         | ...              | ...                                          | ...                 | ...            | ...               | ...      | (11.1)            |
| Piyavhatkul <i>et al.</i> , 2008   | ...         | 50.0             | ...                                          | ...                 | ...            | (9.6)             | ...      | 31.0 (35.1)       |
| Ponnamperuma&Nicolson, 2018        | 13.6±1.11   | ...              | ...                                          | ...                 | ...            | ...               | ...      | (14.1)            |
| Prueksitanond&Kongsakol, 2007      | 67.6±6.5    | ...              | ...                                          | ...                 | ...            | (24.1)            | ...      | ...               |
| Pyari <i>et al.</i> , 2012         | ...         | ...              | ...                                          | ...                 | ...            | ...               | ...      | (64)              |
| Rajkumar <i>et al.</i> , 2011      | 33.6±14.5   | ...              | ...                                          | ...                 | ...            | ...               | ...      | (15.1)            |
| Rajkumar <i>et al.</i> , 2015      | 33.7±14.5   | ...              | ...                                          | ...                 | ...            | ...               | ...      | (9)               |
| Ranasinghe & Levy, 2007            | 38.39±14.5  | ...              | ...                                          | ...                 | ...            | (68.9)            | ...      | (55.6)            |
| Rosendal <i>et al.</i> , 2011      | 43.0±12.7   | ...              | ...                                          | ...                 | ...            | (6.4)             | ...      | (10.2)            |
| Rosendal <i>et al.</i> , 2014      | 43.2±12.7   | ...              | ...                                          | ...                 | ...            | ...               | ...      | (27.7)            |
| Sattler <i>et al.</i> , 2014       | 36±11       | ...              | ...                                          | ...                 | ...            | ...               | ...      | 37.11±1.02        |
| Siqveland <i>et al.</i> , 2015     | 40.5±11.3   | ...              | ...                                          | ...                 | ...            | 2.7±4.2           | ...      | 31.6±15.1         |
| Souza <i>et al.</i> , 2007         | 40.3±14.1   | ...              | ...                                          | ...                 | ...            | (77.1)            | ...      | ...               |
| Soysa, 2013                        | 12.89±0.4   | ...              | ...                                          | ...                 | ...            | ...               | ...      | 1.44±0.4 (76.7)   |
| Suar <i>et al.</i> , 2015          | 38.16±11.1  | ...              | ...                                          | ...                 | 24.72±6.345    | 9.5±2.925         | ...      | 6.995±2.02 (32)   |
| Sveen <i>et al.</i> , 2018         | ...         | ...              | ...                                          | ...                 | ...            | ...               | ...      | ...               |
| Tang, 2006                         | 34.14±10.57 | 40.0             | ...                                          | ...                 | ...            | ...               | ...      | ...               |
| Telles <i>et al.</i> , 2007        | ...         | ...              | ...                                          | ...                 | 7.5±1.95       | ...               | ...      | ...               |
| Thavichachart <i>et al.</i> , 2009 | 38.73±14.14 | ...              | ...                                          | ...                 | (3.1)          | 9.32±8.86 (14.3)  | ...      | (33.6)            |
| Thienkrua <i>et al.</i> , 2006     | 10.1        | ...              | ...                                          | ...                 | ...            | (8.6)             | ...      | (12.4)            |
| Ularntinon <i>et al.</i> , 2008    | 11.35±2.37  | 26.7             | ...                                          | ...                 | (11.1)         | (15.6)            | ...      | (15.6)            |
| Uttervall <i>et al.</i> , 2014     | ...         | 44.2             | ...                                          | ...                 | ...            | ...               | ...      | ...               |
| Van Griensven <i>et al.</i> , 2006 | 41.5±15.3   | 26.9             | ...                                          | ...                 | (29.6)         | (20.4)            | ...      | (7.3)             |
| Vetter <i>et al.</i> , 2008        | 37.9±13.2   | ...              | ...                                          | ...                 | ...            | ...               | ...      | ...               |
| Vetter <i>et al.</i> , 2011        | ...         | ...              | ...                                          | ...                 | ...            | ...               | ...      | 54.1±11.0 (46.9)  |
| Vijayakumar &Kumar, 2008           | 38.2±14.0   | ...              | 14.65±5.5                                    | ...                 | ...            | 20.9±8.3          | ...      | 12.6±4.7          |
| Vijaykumar <i>et al.</i> , 2006    | 12.4±1.42   | ...              | ...                                          | ...                 | ...            | ...               | ...      | (46.1)            |
| Viswanath <i>et al.</i> , 2012     | ...         | ...              | ...                                          | ...                 | (5.9)          | (22.1)            | 1.0      | (11.2)            |
| Viswanath <i>et al.</i> , 2013     | 40.65±17.0  | ...              | ...                                          | ...                 | (5.5)          | (21.5)            | 0.6      | (11.2)            |
| Wahlström <i>et al.</i> , 2010     | ...         | ...              | ...                                          | ...                 | ...            | ...               | ...      | ...               |
| Wahlström <i>et al.</i> , 2008     | ...         | 27.1             | ...                                          | ...                 | ...            | ...               | ...      | (23.9)            |
| Wahlström <i>et al.</i> , 2013a    | ...         | ...              | ...                                          | ...                 | ...            | ...               | ...      | ...               |
| Wahlström <i>et al.</i> , 2013b    | ...         | 26.6             | ...                                          | ...                 | ...            | ...               | ...      | (23.8)            |
| Wickrama & Wickrama, 2008          | ...         | ...              | ...                                          | ...                 | ...            | 27.88±8.31 (37.8) | ...      | 16.0±4.2 (19.9)   |
| Wickrama & Wickrama, 2011          | 42          | ...              | ...                                          | ...                 | ...            | 27.88±6.69 (37.8) | ...      | 21.3±6.61 (19.9)  |
| Wickrama &Kaspar, 2007             | ...         | ...              | ...                                          | ...                 | ...            | 11.26±6.21        | ...      | 13.03±5.54 (40.9) |
| Wickrama &Kaspar, 2007             | ...         | ...              | ...                                          | ...                 | ...            | 25.68±8.31 (37.8) | ...      | 17.07±4.53 (19.6) |
| Wiguna <i>et al.</i> , 2010        | 10.38±1.89  | ...              | ...                                          | ...                 | ...            | (13.9)            | ...      | (30.1)            |
| Aneelraj <i>et al.</i> , 2015      | 11.5±3.0    | ...              | ...                                          | ...                 | (15.5)         | ...               | ...      | ...               |

| First author              | Intrusion Mean±SD | Avoidance Mean±SD (%) | Hyper-arousal Mean±SD | Suicidal tendency % | Insomnia % | Prolonged Grief Disorder % | Social isolation % | Other MH illness                                                                                                                                                                                                                                             |
|---------------------------|-------------------|-----------------------|-----------------------|---------------------|------------|----------------------------|--------------------|--------------------------------------------------------------------------------------------------------------------------------------------------------------------------------------------------------------------------------------------------------------|
| Studies on Cyclone        |                   |                       |                       |                     |            |                            |                    |                                                                                                                                                                                                                                                              |
| Kar <i>et al.</i> , 2004  | ...               | ...                   | ...                   | 12.6                | ...        | ...                        | ...                | Fear: 92%; Lack of hope: 55.6%                                                                                                                                                                                                                               |
| Kar <i>et al.</i> , 2006  | ...               | (53.7)                | ...                   | 21.3                | 29.6       | ...                        | ...                | Difficulty in concentration: 52.8%,<br>Feeling guilty: 37%                                                                                                                                                                                                   |
| Kar <i>et al.</i> , 2007  | ...               | (60)                  | ...                   | ...                 | 8.3        | ...                        | 18.8               | Mood disorder: 28.2%;<br>Hypervigilance: 41.2%; Distressing persistent recollection: 53%;<br>Difficulty in concentration: 36.9%;<br>Disaster memories: 83.4%; Easily startled: 36.2%; Fear of recurrences of event: 46.3%; Lack of hope: 26.8%; Anger: 24.8% |
| Suar <i>et al.</i> , 2002 | ...               | ...                   | ...                   | ...                 | ...        | ...                        | ...                | Neuroticism Mean±SD: 9.74±3.42                                                                                                                                                                                                                               |

Contd...

**Supplementary Table 5: Contd...**

| First author                          | Intrusion<br>Mean±SD | Avoidance<br>Mean±SD<br>(%) | Hyper-<br>arousal<br>Mean±SD | Suicidal<br>tendency<br>% | Insomnia<br>% | Prolonged<br>Grief<br>Disorder % | Social<br>isolation<br>% | Other MH illness                                                                                                                                                                                                    |
|---------------------------------------|----------------------|-----------------------------|------------------------------|---------------------------|---------------|----------------------------------|--------------------------|---------------------------------------------------------------------------------------------------------------------------------------------------------------------------------------------------------------------|
| Kim <i>et al.</i> , 2010              | ...                  | ...                         | ...                          | ...                       | ...           | ...                              | ...                      | ...                                                                                                                                                                                                                 |
| Hanć <i>et al.</i> , 2022             | ...                  | ...                         | ...                          | ...                       | ...           | ...                              | ...                      | ...                                                                                                                                                                                                                 |
| Mamun <i>et al.</i> , 2019            | ...                  | ...                         | ...                          | ...                       | ...           | ...                              | ...                      | ...                                                                                                                                                                                                                 |
| Kar <i>et al.</i> , 2021              | ...                  | (31.2)                      | ...                          | 14                        | ...           | ...                              | 26                       | Nightmares: 83.1%; Intrusive thought: 71.4%; Disaster memories: 40.3%; Constantly on guard: 76.6%; Easily startled: 33.8%; Feeling numb: 16.9; Feeling guilty: 13%; Blame self & others: 13%<br>Mood disorder: 82.2 |
| Hossain <i>et al.</i> , 2021          | ...                  | ...                         | ...                          | 10.9                      | ...           | ...                              | ...                      | ...                                                                                                                                                                                                                 |
| Studies on Flood                      | ...                  | ...                         | ...                          | 8.8                       | 62.5          | ...                              | 75                       | Substance use: 12.5%                                                                                                                                                                                                |
| Kaiser, 2023                          | ...                  | ...                         | ...                          | ...                       | ...           | ...                              | ...                      | VAS Anxiety Mean±SD: 7.4±1.0;<br>VAS Sad Mean±SD: 8.2±1.1; VAS<br>Insomnia Mean±SD: 7.0±1.3                                                                                                                         |
| Mathew, 2021                          | ...                  | ...                         | ...                          | ...                       | ...           | ...                              | ...                      | ...                                                                                                                                                                                                                 |
| Wahid <i>et al.</i> , 2023            | ...                  | ...                         | ...                          | ...                       | ...           | ...                              | ...                      | ...                                                                                                                                                                                                                 |
| Joy <i>et al.</i> , 2021              | ...                  | ...                         | ...                          | ...                       | ...           | ...                              | ...                      | ...                                                                                                                                                                                                                 |
| Amarnath <i>et al.</i> , 2016         | ...                  | ...                         | ...                          | ...                       | ...           | ...                              | ...                      | Fear: 10.8%                                                                                                                                                                                                         |
| Ishikawa <i>et al.</i> , 2013         | ...                  | ...                         | ...                          | ...                       | ...           | ...                              | ...                      | ...                                                                                                                                                                                                                 |
| Asim <i>et al.</i> , 2022             | 4.22±3.45            | 1.67±0.93                   | 3.1±1.76                     | ...                       | ...           | ...                              | ...                      | General Anxiety Disorder<br>Mean±SD: 2.2±1.7; Physical Health<br>Question.ire Mean±SD: 2.5±2.0;<br>PCL5 Mean±SD: 7.89±5.37                                                                                          |
| Haris <i>et al.</i> , 2020            | ...                  | ...                         | ...                          | ...                       | ...           | ...                              | ...                      | ...                                                                                                                                                                                                                 |
| Channaveerachari <i>et al.</i> , 2015 | ...                  | ...                         | ...                          | ...                       | ...           | ...                              | ...                      | Somatic disorder: 0.7%; Psychosis:<br>2.1%; Adjustment disorder: 1.2%;<br>Panic disorder: 0.6%; Obsessive<br>compulsive disorder: 0.1%                                                                              |
| Telles <i>et al.</i> , 2009           | ...                  | ...                         | ...                          | ...                       | ...           | ...                              | ...                      | ...                                                                                                                                                                                                                 |
| Mahmud <i>et al.</i> , 2021           | ...                  | ...                         | ...                          | ...                       | ...           | ...                              | ...                      | ...                                                                                                                                                                                                                 |
| Oba <i>et al.</i> , 2010              | ...                  | ...                         | ...                          | ...                       | ...           | ...                              | ...                      | ...                                                                                                                                                                                                                 |
| Yoda <i>et al.</i> , 2017             | ...                  | ...                         | ...                          | ...                       | ...           | ...                              | ...                      | ...                                                                                                                                                                                                                 |
| Hassan <i>et al.</i> , 2018           | 12.2±4.18            | 11.73±4.09<br>(32.81)       | ...                          | ...                       | ...           | ...                              | ...                      | CRIES Mean±SD: 23.94±6.68;<br>Shock: 54.68%; Intrusive thought:<br>23.68%; Difficulty in concentration:<br>68.75%; Helplessness: 42.18%,<br>Flashback: 53.12%                                                       |
| Mathew <i>et al.</i> , 2021           | ...                  | ...                         | ...                          | ...                       | ...           | ...                              | ...                      | Disaster memories: 41.6%                                                                                                                                                                                            |
| Telles <i>et al.</i> , 2010           | ...                  | ...                         | ...                          | ...                       | ...           | ...                              | ...                      | VAS Anxiety Mean±SD: 5.24±2.94;<br>VAS Sad Mean±SD: 6.69±2.98;<br>VAS Fear Mean±SD: 3.42±2.54;<br>VAS insomnia Mean±SD:<br>2.43±3.38                                                                                |
| Thomas <i>et al.</i> , 2021           | ...                  | ...                         | ...                          | 1.2                       | 35.7          | ...                              | 1.2                      | Somatic disorder: 28.7; Substance<br>use: 15.8%; Anger: 4.1%; Mania:<br>1.2%; Psychosis: 0.6%                                                                                                                       |
| Ma <i>et al.</i> , 2019               | ...                  | ...                         | ...                          | ...                       | ...           | ...                              | ...                      | ...                                                                                                                                                                                                                 |
| Bandla <i>et al.</i> , 2019           | ...                  | ...                         | ...                          | ...                       | ...           | ...                              | ...                      | Fear: 28.3%; Shock: 50.1%;<br>Feeling numb: 2.5%; Substance<br>use: 12.1%                                                                                                                                           |
| Wind <i>et al.</i> , 2013             | ...                  | ...                         | ...                          | ...                       | ...           | ...                              | ...                      | ...                                                                                                                                                                                                                 |
| Wind <i>et al.</i> , 2014             | ...                  | ...                         | ...                          | ...                       | ...           | ...                              | ...                      | ...                                                                                                                                                                                                                 |
| Sanguanklin <i>et al.</i> , 2014      | ...                  | ...                         | ...                          | ...                       | ...           | ...                              | ...                      | ...                                                                                                                                                                                                                 |
| Mamun <i>et al.</i> , 2021            | ...                  | ...                         | ...                          | 2.0                       | ...           | ...                              | ...                      | ...                                                                                                                                                                                                                 |
| Assanangkornchai <i>et al.</i> , 2004 | 6.4±7.2              | 7.0±4.6                     | ...                          | ...                       | ...           | ...                              | ...                      | Alcohol dependence: 4.1%                                                                                                                                                                                            |
| Assanangkornchai <i>et al.</i> , 2007 | ...                  | ...                         | ...                          | ...                       | ...           | ...                              | ...                      | ...                                                                                                                                                                                                                 |
| Dar <i>et al.</i> , 2018              | ...                  | ...                         | ...                          | ...                       | ...           | ...                              | ...                      | PCL5 Mean±SD: 48.26±3.42                                                                                                                                                                                            |
| Singh & Verma, 2023                   | 14.82                | 11.3                        | 13.09                        | ...                       | ...           | ...                              | ...                      | ...                                                                                                                                                                                                                 |
| Studies on Tsunami                    | ...                  | ...                         | ...                          | ...                       | ...           | ...                              | ...                      | ...                                                                                                                                                                                                                 |
| Adebäck <i>et al.</i> , 2021          | ...                  | ...                         | ...                          | ...                       | ...           | ...                              | ...                      | ...                                                                                                                                                                                                                 |
| Adebäck <i>et al.</i> , 2018          | ...                  | ...                         | ...                          | 5.0                       | ...           | ...                              | ...                      | Self Reported Health: 17%                                                                                                                                                                                           |

Contd...

**Supplementary Table 5: Contd...**

| First author                        | Intrusion<br>Mean±SD | Avoidance<br>Mean±SD<br>(%) | Hyper-<br>arousal<br>Mean±SD | Suicidal<br>tendency<br>% | Insomnia<br>% | Prolonged<br>Grief<br>Disorder % | Social<br>isolation<br>% | Other MH illness                                                                                                                                                                                                                                                                |
|-------------------------------------|----------------------|-----------------------------|------------------------------|---------------------------|---------------|----------------------------------|--------------------------|---------------------------------------------------------------------------------------------------------------------------------------------------------------------------------------------------------------------------------------------------------------------------------|
| Agampodi <i>et al.</i> , 2011       | ...                  | ...                         | ...                          | ...                       | ...           | ...                              | ...                      | Fear: 56.8%; Fear of recurrence of event: 57.7%; Emotional symptoms: 10.4%; Conduct problem: 9.2%; Hyperactivity: 41.2%; Peer problem: 28.1%; Pro-social scale: 11.2%                                                                                                           |
| Agustini <i>et al.</i> , 2011       | ...                  | (36.6)                      | ...                          | ...                       | 31.6          | ...                              | ...                      | TESS-Occurrence Scales (OS) Mean±SD: 9.2±4.3; TESS-Distress Scales (DS) Mean±SD: 34.9±18.8; Fear: 31.6%; Nightmares: 22%; Difficulty in concentration: 31.6%; Easily startled: 34.7%; Feeling guilty: 14.5%; Somatic disorder: 30.5%; Flashback: 19.1%; Social avoidance: 36.6% |
| Arnberg <i>et al.</i> , 2012        | ...                  | ...                         | ...                          | ...                       | ...           | ...                              | ...                      | ...                                                                                                                                                                                                                                                                             |
| Arnberg <i>et al.</i> , 2013        | ...                  | ...                         | ...                          | 8.5                       | ...           | ...                              | ...                      | Alcohol dependence: 0.7%; Specific phobia: 7%                                                                                                                                                                                                                                   |
| Arnberg <i>et al.</i> , 2014        | ...                  | ...                         | ...                          | ...                       | ...           | ...                              | ...                      | Alcohol dependence: 3%                                                                                                                                                                                                                                                          |
| Arnberg <i>et al.</i> , 2015        | ...                  | ...                         | ...                          | 1.1                       | ...           | ...                              | ...                      | Alcohol dependence: 1.2%; Substance use: 0.5%                                                                                                                                                                                                                                   |
| Baddam John <i>et al.</i> , 2007    | ...                  | ...                         | ...                          | ...                       | ...           | ...                              | ...                      | IES-8 Score Mean±SD: 26.09±6.04                                                                                                                                                                                                                                                 |
| Banford <i>et al.</i> , 2016        | ...                  | ...                         | ...                          | ...                       | ...           | ...                              | ...                      | ...                                                                                                                                                                                                                                                                             |
| Becker, 2009                        | 8.41±5.84            | 8.18±4.03                   | 8.57±4.82                    | ...                       | ...           | ...                              | ...                      | ...                                                                                                                                                                                                                                                                             |
| Berger & Gelkopf, 2009              | ...                  | ...                         | ...                          | ...                       | ...           | ...                              | ...                      | ...                                                                                                                                                                                                                                                                             |
| Bondjers <i>et al.</i> , 2018       | 15.5±3.4             | 9.6±4.5                     | 8.2±3.0                      | ...                       | ...           | ...                              | ...                      | ...                                                                                                                                                                                                                                                                             |
| Chaiphibalsarisdi, 2008             | ...                  | ...                         | ...                          | ...                       | ...           | ...                              | ...                      | Quality of Life Mean±SD: 89.52±12.24                                                                                                                                                                                                                                            |
| Dawson & Bryant, 2016               | ...                  | ...                         | ...                          | ...                       | ...           | ...                              | ...                      | ...                                                                                                                                                                                                                                                                             |
| Descilo <i>et al.</i> , 2009        | ...                  | ...                         | ...                          | ...                       | ...           | ...                              | ...                      | Quality of Life Mean: 22.7                                                                                                                                                                                                                                                      |
| Du <i>et al.</i> , 2012             | ...                  | ...                         | ...                          | ...                       | ...           | ...                              | ...                      | Fear: 23.4%                                                                                                                                                                                                                                                                     |
| Dyb <i>et al.</i> , 2011            | ...                  | ...                         | ...                          | ...                       | ...           | ...                              | ...                      | ...                                                                                                                                                                                                                                                                             |
| Dyster-Aas <i>et al.</i> , 2012     | 14.1±7.62            | 8±7.11                      | 6.9±6.17                     | ...                       | ...           | ...                              | ...                      | ...                                                                                                                                                                                                                                                                             |
| Exenberger <i>et al.</i> , 2016     | 5.74±4.5             | 7.64±5.1                    | ...                          | ...                       | ...           | ...                              | ...                      | CRIES Mean±SD: 12.4±7.6                                                                                                                                                                                                                                                         |
| Exenberger <i>et al.</i> , 2019     | 5.8±4.6              | 7±5.2                       | 6.5±4.6                      | ...                       | ...           | ...                              | ...                      | CRIES Mean±SD: 19.3±10.2                                                                                                                                                                                                                                                        |
| Faisal & Zulfa, 2004                | ...                  | (1.5)                       | ...                          | ...                       | 20.6          | ...                              | ...                      | Nightmares: 17.2                                                                                                                                                                                                                                                                |
| Frankenberg <i>et al.</i> , 2012    | ...                  | ...                         | ...                          | ...                       | ...           | ...                              | ...                      | ...                                                                                                                                                                                                                                                                             |
| Frankenberg <i>et al.</i> , 2008    | ...                  | ...                         | ...                          | ...                       | ...           | ...                              | ...                      | ...                                                                                                                                                                                                                                                                             |
| George <i>et al.</i> , 2012         | ...                  | ...                         | ...                          | ...                       | ...           | ...                              | ...                      | ...                                                                                                                                                                                                                                                                             |
| Gudmundsdottir <i>et al.</i> , 2018 | ...                  | ...                         | ...                          | ...                       | ...           | ...                              | ...                      | ...                                                                                                                                                                                                                                                                             |
| Gunaratne <i>et al.</i> , 2014      | ...                  | ...                         | ...                          | ...                       | ...           | ...                              | ...                      | Inability to cope: 34%; Lack of hope: 32%; Substance use: 6.2%                                                                                                                                                                                                                  |
| Hagen <i>et al.</i> , 2016          | ...                  | ...                         | ...                          | ...                       | ...           | ...                              | ...                      | ...                                                                                                                                                                                                                                                                             |
| Heir & Weisaeth, 2008               | ...                  | ...                         | ...                          | ...                       | ...           | ...                              | ...                      | ...                                                                                                                                                                                                                                                                             |
| Heir <i>et al.</i> , 2009a          | ...                  | ...                         | ...                          | ...                       | ...           | ...                              | ...                      | ...                                                                                                                                                                                                                                                                             |
| Heir <i>et al.</i> , 2009b          | ...                  | ...                         | ...                          | ...                       | ...           | ...                              | ...                      | ...                                                                                                                                                                                                                                                                             |
| Heir <i>et al.</i> , 2010           | 1.22±0.83            | 0.86±0.72                   | 0.81±0.76                    | ...                       | ...           | ...                              | ...                      | ...                                                                                                                                                                                                                                                                             |
| Heir <i>et al.</i> , 2011           | ...                  | ...                         | ...                          | ...                       | ...           | ...                              | ...                      | ...                                                                                                                                                                                                                                                                             |
| Heir <i>et al.</i> , 2011           | ...                  | ...                         | ...                          | ...                       | ...           | ...                              | ...                      | PCL5 Mean±SD: 30.05±12.95                                                                                                                                                                                                                                                       |
| Heir <i>et al.</i> , 2011           | ...                  | ...                         | ...                          | ...                       | ...           | ...                              | ...                      | ...                                                                                                                                                                                                                                                                             |
| Heir <i>et al.</i> , 2021           | ...                  | ...                         | ...                          | ...                       | ...           | ...                              | ...                      | Fear: 50.1%; Helplessness: 54.3%, Horror: 4.6%                                                                                                                                                                                                                                  |
| Hollifield <i>et al.</i> , 2008     | ...                  | ...                         | ...                          | ...                       | ...           | ...                              | ...                      | ...                                                                                                                                                                                                                                                                             |
| Hussain <i>et al.</i> , 2011        | ...                  | ...                         | ...                          | ...                       | ...           | ...                              | ...                      | Psychological Distress Score (GHQ28) Mean±SD: 25.25±13.85                                                                                                                                                                                                                       |
| Hussain <i>et al.</i> , 2013        | ...                  | ...                         | ...                          | ...                       | ...           | ...                              | ...                      | Fear: 69.3%; Helplessness: 69.3%                                                                                                                                                                                                                                                |

Contd...

**Supplementary Table 5: Contd...**

| First author                        | Intrusion<br>Mean±SD | Avoidance<br>Mean±SD<br>(%) | Hyper-<br>arousal<br>Mean±SD | Suicidal<br>tendency<br>% | Insomnia<br>% | Prolonged<br>Grief<br>Disorder % | Social<br>isolation<br>% | Other MH illness                                                                                                                    |
|-------------------------------------|----------------------|-----------------------------|------------------------------|---------------------------|---------------|----------------------------------|--------------------------|-------------------------------------------------------------------------------------------------------------------------------------|
| Irmansyah <i>et al.</i> , 2010      | ...                  | ...                         | ...                          | ...                       | ...           | ...                              | ...                      | Self-Reporting Questionnaire<br>Mean±SD: 9.49±4.91; Connor<br>Davidson Resilience Mean±SD:<br>2.3±1.22; Alcohol dependence:<br>2.9% |
| Isaranuwatthai <i>et al.</i> , 2013 | ...                  | ...                         | ...                          | ...                       | ...           | ...                              | ...                      | .                                                                                                                                   |
| Isaranuwatthai <i>et al.</i> , 2017 | ...                  | ...                         | ...                          | ...                       | ...           | ...                              | ...                      | Negative feeling: 55.8%; Social<br>functioning Mean: 40.5                                                                           |
| Isuru <i>et al.</i> , 2018          | ...                  | ...                         | ...                          | ...                       | ...           | 15.4                             | ...                      | ...                                                                                                                                 |
| Jensen <i>et al.</i> , 2009         | ...                  | ...                         | ...                          | ...                       | ...           | ...                              | ...                      | ...                                                                                                                                 |
| Johannesson <i>et al.</i> , 2009a   | ...                  | ...                         | ...                          | 9.6                       | ...           | ...                              | ...                      | ...                                                                                                                                 |
| Johannesson <i>et al.</i> , 2009b   | ...                  | ...                         | ...                          | ...                       | ...           | ...                              | ...                      | ...                                                                                                                                 |
| Johannesson <i>et al.</i> , 2011a   | ...                  | ...                         | ...                          | ...                       | ...           | 45.0                             | ...                      | ...                                                                                                                                 |
| Johannesson <i>et al.</i> , 2011b   | ...                  | ...                         | ...                          | ...                       | ...           | ...                              | ...                      | ...                                                                                                                                 |
| Johannesson <i>et al.</i> , 2015    | ...                  | ...                         | ...                          | ...                       | ...           | ...                              | ...                      | ...                                                                                                                                 |
| Kar <i>et al.</i> , 2014            | ...                  | ...                         | ...                          | 6.5                       | ...           | ...                              | ...                      | Self-Reporting Questionnaire:<br>77.6%; Quality of Life Mean±SD:<br>5.85±2.45                                                       |
| Keraite <i>et al.</i> , 2016        | ...                  | ...                         | ...                          | ...                       | ...           | ...                              | ...                      | Psychosis: 13.5%                                                                                                                    |
| Ketumarn <i>et al.</i> , 2009       | ...                  | ...                         | ...                          | ...                       | ...           | ...                              | ...                      | ...                                                                                                                                 |
| Kongsakon <i>et al.</i> , 2012      | ...                  | ...                         | ...                          | ...                       | ...           | ...                              | ...                      | ...                                                                                                                                 |
| Kraemer <i>et al.</i> , 2009a       | ...                  | ...                         | ...                          | ...                       | ...           | ...                              | ...                      | Posttraumatic Diagnostic Scale<br>Mean±SD: 6.2±8.4; Posttraumatic<br>Growth Inventory Mean±SD:<br>41.1±27.4                         |
| Kraemer <i>et al.</i> , 2009b       | ...                  | ...                         | ...                          | ...                       | ...           | ...                              | ...                      | Fear: 75.9%; Helplessness: 75.9%                                                                                                    |
| Krishnaswamy <i>et al.</i> , 2012   | ...                  | ...                         | ...                          | ...                       | ...           | ...                              | ...                      | ...                                                                                                                                 |
| Kristensen <i>et al.</i> , 2009     | 1.94                 | 1.27                        | 1.74                         | ...                       | ...           | 23.3                             | ...                      | ...                                                                                                                                 |
| Kristensen <i>et al.</i> , 2010     | ...                  | ...                         | ...                          | ...                       | ...           | ...                              | ...                      | Complicated grief: 46.9%                                                                                                            |
| Kristensen <i>et al.</i> , 2015     | ...                  | ...                         | ...                          | ...                       | ...           | 14.9                             | ...                      | ...                                                                                                                                 |
| Kumar <i>et al.</i> , 2007          | ...                  | ...                         | ...                          | ...                       | ...           | ...                              | ...                      | ...                                                                                                                                 |
| Laurito <i>et al.</i> , 2022        | ...                  | ...                         | ...                          | ...                       | ...           | ...                              | ...                      | ...                                                                                                                                 |
| Lee <i>et al.</i> , 2015            | ...                  | ...                         | ...                          | ...                       | ...           | ...                              | ...                      | ...                                                                                                                                 |
| Levy <i>et al.</i> , 2008           | ...                  | ...                         | ...                          | ...                       | ...           | ...                              | ...                      | ...                                                                                                                                 |
| Lommen <i>et al.</i> , 2006         | ...                  | ...                         | ...                          | ...                       | ...           | ...                              | ...                      | ...                                                                                                                                 |
| Marres <i>et al.</i> , 2011         | ...                  | ...                         | ...                          | ...                       | ...           | ...                              | ...                      | ...                                                                                                                                 |
| Marthoenis <i>et al.</i> , 2018     | ...                  | ...                         | ...                          | ...                       | ...           | ...                              | ...                      | General Anxiety Disorder<br>Mean±SD: 5.6±4.0; Physical Health<br>Questionnaire Mean±SD: 6.3±4.0                                     |
| Math <i>et al.</i> , 2006           | ...                  | ...                         | ...                          | ...                       | ...           | ...                              | ...                      | ...                                                                                                                                 |
| Math <i>et al.</i> , 2008a          | ...                  | ...                         | ...                          | ...                       | ...           | ...                              | ...                      | Somatic disorders: 5.4%;<br>Adjustment disorders: 13.5; Panic<br>disorder: 10.8                                                     |
| Math <i>et al.</i> , 2008b          | ...                  | ...                         | ...                          | ...                       | ...           | ...                              | 0.4                      | Somatic disorder: 3.2%;<br>Adjustment disorder: 37.5%; Panic<br>disorder: 13.3%; Phobiotic disorder:<br>0.8%                        |
| Meynard <i>et al.</i> , 2008        | ...                  | ...                         | ...                          | ...                       | ...           | ...                              | ...                      | ...                                                                                                                                 |
| Michélsen <i>et al.</i> , 2017      | ...                  | ...                         | ...                          | ...                       | ...           | ...                              | ...                      | Posttraumatic Growth Inventory<br>Mean±SD: 30.98±24.63                                                                              |
| Musa <i>et al.</i> , 2014           | ...                  | ...                         | ...                          | ...                       | ...           | ...                              | ...                      | ...                                                                                                                                 |
| Neuner <i>et al.</i> , 2006         | ...                  | (38.6)                      | (56.8)                       | ...                       | ...           | ...                              | ...                      | Intrusive thoughts: 62.5%                                                                                                           |
| Nomura <i>et al.</i> , 2010         | ...                  | ...                         | ...                          | ...                       | ...           | ...                              | ...                      | ...                                                                                                                                 |
| Nygaard & Heir, 2012                | ...                  | ...                         | ...                          | ...                       | ...           | ...                              | ...                      | Quality of Life Mean±SD: 7.2±1.9                                                                                                    |
| Nygaard <i>et al.</i> , 2011        | ...                  | ...                         | ...                          | ...                       | ...           | ...                              | ...                      | ...                                                                                                                                 |
| Nygaard <i>et al.</i> , 2012        | ...                  | ...                         | ...                          | ...                       | ...           | ...                              | ...                      | ...                                                                                                                                 |
| Nygaard <i>et al.</i> , 2010        | ...                  | ...                         | ...                          | ...                       | ...           | ...                              | ...                      | ...                                                                                                                                 |
| Nygaard <i>et al.</i> , 2016        | ...                  | ...                         | ...                          | ...                       | ...           | ...                              | ...                      | ...                                                                                                                                 |
| Pairojkul <i>et al.</i> , 2010      | ...                  | ...                         | ...                          | ...                       | ...           | ...                              | ...                      | ...                                                                                                                                 |
| Pityaratstian <i>et al.</i> , 2007  | 7.68±4.31            | 7.4±4.88                    | 7.7±5.18                     | ...                       | ...           | ...                              | ...                      | CRIES Mean±SD: 22.76±10.74                                                                                                          |

Contd...

**Supplementary Table 5: Contd...**

| First author                       | Intrusion<br>Mean±SD | Avoidance<br>Mean±SD<br>(%) | Hyper-<br>arousal<br>Mean±SD | Suicidal<br>tendency<br>% | Insomnia<br>% | Prolonged<br>Grief<br>Disorder % | Social<br>isolation<br>% | Other MH illness                                                                                                                                                                                |
|------------------------------------|----------------------|-----------------------------|------------------------------|---------------------------|---------------|----------------------------------|--------------------------|-------------------------------------------------------------------------------------------------------------------------------------------------------------------------------------------------|
| Piyasil <i>et al.</i> , 2007       | ...                  | ...                         | ...                          | ...                       | ...           | ...                              | ...                      | ...                                                                                                                                                                                             |
| Piyasil <i>et al.</i> , 2008       | ...                  | ...                         | ...                          | ...                       | ...           | ...                              | ...                      | ...                                                                                                                                                                                             |
| Piyasil <i>et al.</i> , 2011       | ...                  | ...                         | ...                          | ...                       | ...           | ...                              | ...                      | ...                                                                                                                                                                                             |
| Piyavhatkul <i>et al.</i> , 2008   | ...                  | ...                         | ...                          | ...                       | ...           | ...                              | ...                      | Adjustment disorder: 9.6%                                                                                                                                                                       |
| Ponnamperuma&Nicolson, 2018        | ...                  | ...                         | ...                          | ...                       | ...           | ...                              | ...                      | ...                                                                                                                                                                                             |
| Prueksaritanond&Kongsakol, 2007    | ...                  | ...                         | ...                          | ...                       | ...           | ...                              | ...                      | ...                                                                                                                                                                                             |
| Pyari <i>et al.</i> , 2012         | ...                  | ...                         | ...                          | ...                       | ...           | ...                              | ...                      | ...                                                                                                                                                                                             |
| Rajkumar <i>et al.</i> , 2011      | 1.15±0.87            | 0.96±0.88                   | 1.03±0.9                     | ...                       | ...           | ...                              | ...                      | Fear: 77.4%; Traumatic grief: 14.2%; Helplessness: 77.4%                                                                                                                                        |
| Rajkumar <i>et al.</i> , 2015      | ...                  | ...                         | ...                          | ...                       | ...           | 8.1                              | ...                      | ...                                                                                                                                                                                             |
| Ranasinghe & Levy, 2007            | ...                  | (62.8)                      | (80.6)                       | ...                       | ...           | ...                              | ...                      | Fear of recurrences of event: 94.3%                                                                                                                                                             |
| Rosendal <i>et al.</i> , 2011      | ...                  | ...                         | ...                          | ...                       | ...           | ...                              | ...                      | ...                                                                                                                                                                                             |
| Rosendal <i>et al.</i> , 2014      | ...                  | ...                         | ...                          | ...                       | ...           | ...                              | ...                      | ...                                                                                                                                                                                             |
| Sattler <i>et al.</i> , 2014       | ...                  | ...                         | ...                          | ...                       | ...           | ...                              | ...                      | Posttraumatic Growth Inventory<br>Mean±SD: 4.95±0.57                                                                                                                                            |
| Siqveland <i>et al.</i> , 2015     | ...                  | ...                         | ...                          | ...                       | ...           | ...                              | ...                      | Quality of Life Mean±SD: 4.0±0.9;<br>Health related Quality of Life<br>Mean±SD: 3.7±1.2                                                                                                         |
| Souza <i>et al.</i> , 2007         | ...                  | ...                         | ...                          | ...                       | ...           | ...                              | ...                      | HSCL25 Distress: 83.6%                                                                                                                                                                          |
| Soysa, 2013                        | ...                  | (52)                        | ...                          | ...                       | 17            | ...                              | 10                       | Nightmares: 22%; Disaster<br>memories: 85%; Constantly on<br>guard: 52%; Easily startled: 43%;<br>Fear of recurrences of event: 13%;<br>Uncertainty over future: 7%;<br>Emotional symptoms: 35% |
| Suar <i>et al.</i> , 2015          | ...                  | ...                         | ...                          | ...                       | ...           | ...                              | ...                      | ...                                                                                                                                                                                             |
| Sveen <i>et al.</i> , 2018         | ...                  | ...                         | ...                          | ...                       | ...           | ...                              | ...                      | ...                                                                                                                                                                                             |
| Tang, 2006                         | ...                  | ...                         | ...                          | ...                       | ...           | ...                              | ...                      | ...                                                                                                                                                                                             |
| Telles <i>et al.</i> , 2007        | ...                  | ...                         | ...                          | ...                       | ...           | ...                              | ...                      | ...                                                                                                                                                                                             |
| Thavichachart <i>et al.</i> , 2009 | ...                  | ...                         | ...                          | ...                       | ...           | ...                              | ...                      | Blame self & others: 4.7%; Somatic<br>disorders: 8.9%; Substance use:<br>6.3%, Psychosis: 3%; Phobiotic<br>anxiety: 11.9%, Obsessive<br>compulsion: 4.9%                                        |
| Thienkrua <i>et al.</i> , 2006     | ...                  | ...                         | ...                          | ...                       | ...           | ...                              | ...                      | Fear: 75.6%; Panic disorder: 75.6%                                                                                                                                                              |
| Ularntinon <i>et al.</i> , 2008    | ...                  | ...                         | ...                          | ...                       | ...           | ...                              | ...                      | Separation anxiety disorder: 8.9%                                                                                                                                                               |
| Uttervall <i>et al.</i> , 2014     | ...                  | ...                         | ...                          | ...                       | ...           | ...                              | ...                      | ...                                                                                                                                                                                             |
| Van Griensven <i>et al.</i> , 2006 | ...                  | ...                         | ...                          | 4.2                       | 54.6          | ...                              | ...                      | Alcohol dependence: 3.1%;<br>Substance use 4.5%                                                                                                                                                 |
| Vetter <i>et al.</i> , 2008        | ...                  | ...                         | ...                          | ...                       | ...           | ...                              | ...                      | Alcohol dependence: 12.69%;<br>Substance use: 28.65%                                                                                                                                            |
| Vetter <i>et al.</i> , 2011        | ...                  | ...                         | ...                          | 24.0                      | ...           | ...                              | ...                      | Nightmare: 56.2%; Fear of<br>recurrence of event: 51%;<br>Flashback: 56.5%; Obsessive<br>compulsive Mean±SD: 51.5±9.8                                                                           |
| Vijayakumar &Kumar, 2008           | ...                  | ...                         | ...                          | ...                       | ...           | ...                              | ...                      | ...                                                                                                                                                                                             |
| Vijaykumar <i>et al.</i> , 2006    | ...                  | ...                         | ...                          | ...                       | ...           | ...                              | ...                      | ...                                                                                                                                                                                             |
| Viswanath <i>et al.</i> , 2012     | ...                  | ...                         | ...                          | ...                       | ...           | ...                              | ...                      | Dysthemia: 1%, Alcohol<br>dependence: 1.6%; Psychosis:<br>0.2%; Adjustment disorder: 39.5%;<br>Panic disorder: 12.1%, Phobiotic<br>disorder: 0.9%                                               |
| Viswanath <i>et al.</i> , 2013     | ...                  | ...                         | ...                          | ...                       | ...           | ...                              | ...                      | Somatic disorder: 3.2%; Dysthemia:<br>0.6%; Psychosis: 0.2%; Adjustment<br>disorder: 37.5%; Panic disorder:<br>12%, Phobiotic anxiety: 0.8%                                                     |
| Wahlström <i>et al.</i> , 2010     | ...                  | ...                         | ...                          | ...                       | ...           | ...                              | ...                      | ...                                                                                                                                                                                             |
| Wahlström <i>et al.</i> , 2008     | ...                  | ...                         | ...                          | ...                       | ...           | ...                              | ...                      | ...                                                                                                                                                                                             |
| Wahlström <i>et al.</i> , 2013a    | ...                  | ...                         | ...                          | ...                       | ...           | ...                              | ...                      | ...                                                                                                                                                                                             |
| Wahlström <i>et al.</i> , 2013b    | ...                  | ...                         | ...                          | ...                       | ...           | ...                              | ...                      | ...                                                                                                                                                                                             |
| Wickrama & Wickrama, 2008          | ...                  | ...                         | ...                          | ...                       | ...           | ...                              | ...                      | ...                                                                                                                                                                                             |

Contd...

**Supplementary Table 5: Contd...**

| <b>First author</b>           | <b>Intrusion<br/>Mean±SD</b> | <b>Avoidance<br/>Mean±SD<br/>(%)</b> | <b>Hyper-<br/>arousal<br/>Mean±SD</b> | <b>Suicidal<br/>tendency<br/>%</b> | <b>Insomnia<br/>%</b> | <b>Prolonged<br/>Grief<br/>Disorder %</b> | <b>Social<br/>isolation<br/>%</b> | <b>Other MH illness</b>                                                                                                                                                                    |
|-------------------------------|------------------------------|--------------------------------------|---------------------------------------|------------------------------------|-----------------------|-------------------------------------------|-----------------------------------|--------------------------------------------------------------------------------------------------------------------------------------------------------------------------------------------|
| Wickrama & Wickrama, 2011     | ...                          | ...                                  | ...                                   | ...                                | ...                   | ...                                       | ...                               | ...                                                                                                                                                                                        |
| Wickrama & Kaspar, 2007       | ...                          | ...                                  | ...                                   | ...                                | ...                   | ...                                       | ...                               | ...                                                                                                                                                                                        |
| Wickrama & Kaspar, 2007       | ...                          | ...                                  | ...                                   | ...                                | ...                   | ...                                       | ...                               | ...                                                                                                                                                                                        |
| Wiguna <i>et al.</i> , 2010   | ...                          | ...                                  | ...                                   | ...                                | ...                   | ...                                       | ...                               | Psychosis: 0.8%; Adjustment disorders: 1.9%; Emotional symptoms: 56.1; Conduct problems: 33.4%; Hyperactivity: 23.6; Peer problems: 40.7; Prosocial scale: 34.3%; Phobiotic anxiety: 0.25% |
| Aneelraj <i>et al.</i> , 2015 | ...                          | ...                                  | ...                                   | ...                                | ...                   | 11                                        | ...                               | Fear: 15.5%; Disaster memories: 17.5%; Negative feeling: 18.5%; Helplessness: 12.5%; Insecurity: 12%; Fear of recurrences of event: 11%; Uncertainty over future: 10%; Flashback: 9%       |
